# Supplementary material for: Virulence from vesicles: Novel mechanisms of host cell injury by Escherichia coli O104:H4 outbreak strain
Source: PubMed Central journal article supplement (PMC4539607; doi:10.1038/srep13252), 2015-08-18
Supplement: srep13252-s1.pdf [file srep13252-s1.pdf]

## **Virulence from vesicles: Novel mechanisms of host cell injury**

**by *Escherichia coli* O104:H4 outbreak strain**

Lisa Kunsmann, Christian Rüter, Andreas Bauwens, Lilo Greune, Malte Glüder, Björn Kemper, Angelika Fruth, Sun Nyunt Wai, Xiaohua He, Roland Lloubes, M. Alexander Schmidt, Ulrich Dobrindt, Alexander Mellmann, Helge Karch, Martina Bielaszewska

### **Supplementary Methods**

**Comparison of genome sequences of *E. coli* O104:H4 outbreak isolates.** To confirm that the *E. coli* O104:H4 strain LB226692 and the *stx*-negative strain C227-11Φcu are highly homologous (“isogenic”) and representative for the large outbreak in 2011, we determined the genome sequences of both strains using Illumina paired-end sequencing technology<sup>1</sup>. After *denovo* assembly as described elsewhere<sup>1</sup>, we extracted - using STEC O157:H7 strain Sakai as name-giving reference sequence (GenBank accession no. NC\_002695) - all coding regions of both strains and compared them to the fully sequenced and finished genome sequence of *E. coli* O104:H4 outbreak strain 2011C-3493<sup>2</sup> (GenBank accession no. CP003289). Overall, 3533 genes were completely present in all three *E. coli* O104:H4 strains (Supplementary Table S6). Among these, only three genes (ECs0625, ECs0972, and ECs1721) contained single nucleotide polymorphisms (SNP) in comparison to strain 2011C-3493: in ECs0625 there was a SNP in LB226692 (nucleotide position 2650, C→A; Gln→Lys), in ECs0972 there was a SNP in C227-11Φcu (nucleotide position 948, C→G; Gly→Arg), and in ECs1721 there was a SNP in C227-11Φcu (nucleotide position 848, T→A; Glu→Val). Raw reads of strains C227-11Φcu and LB226692 are available at the European Nucleotide Archive (<http://www.ebi.ac.uk/ena/>) under the study accession number PRJEB9313.

## Supplementary references

1. Leopold, S. R., Goering, R. V., Witten, A., Harmsen, D. & Mellmann, A. Bacterial whole-genome sequencing revisited: portable, scalable, and standardized analysis for typing and detection of virulence and antibiotic resistance genes. *J. Clin. Microbiol.* **52**, 2365-2370 (2014).
2. Ahmed, S. A. *et al.* Genomic comparison of *Escherichia coli* O104:H4 isolates from 2009 and 2011 reveals plasmid, and prophage heterogeneity, including Shiga toxin encoding phage *stx2*. *PLoS One* **7**, e48228 (2012).

## Supplementary Figures

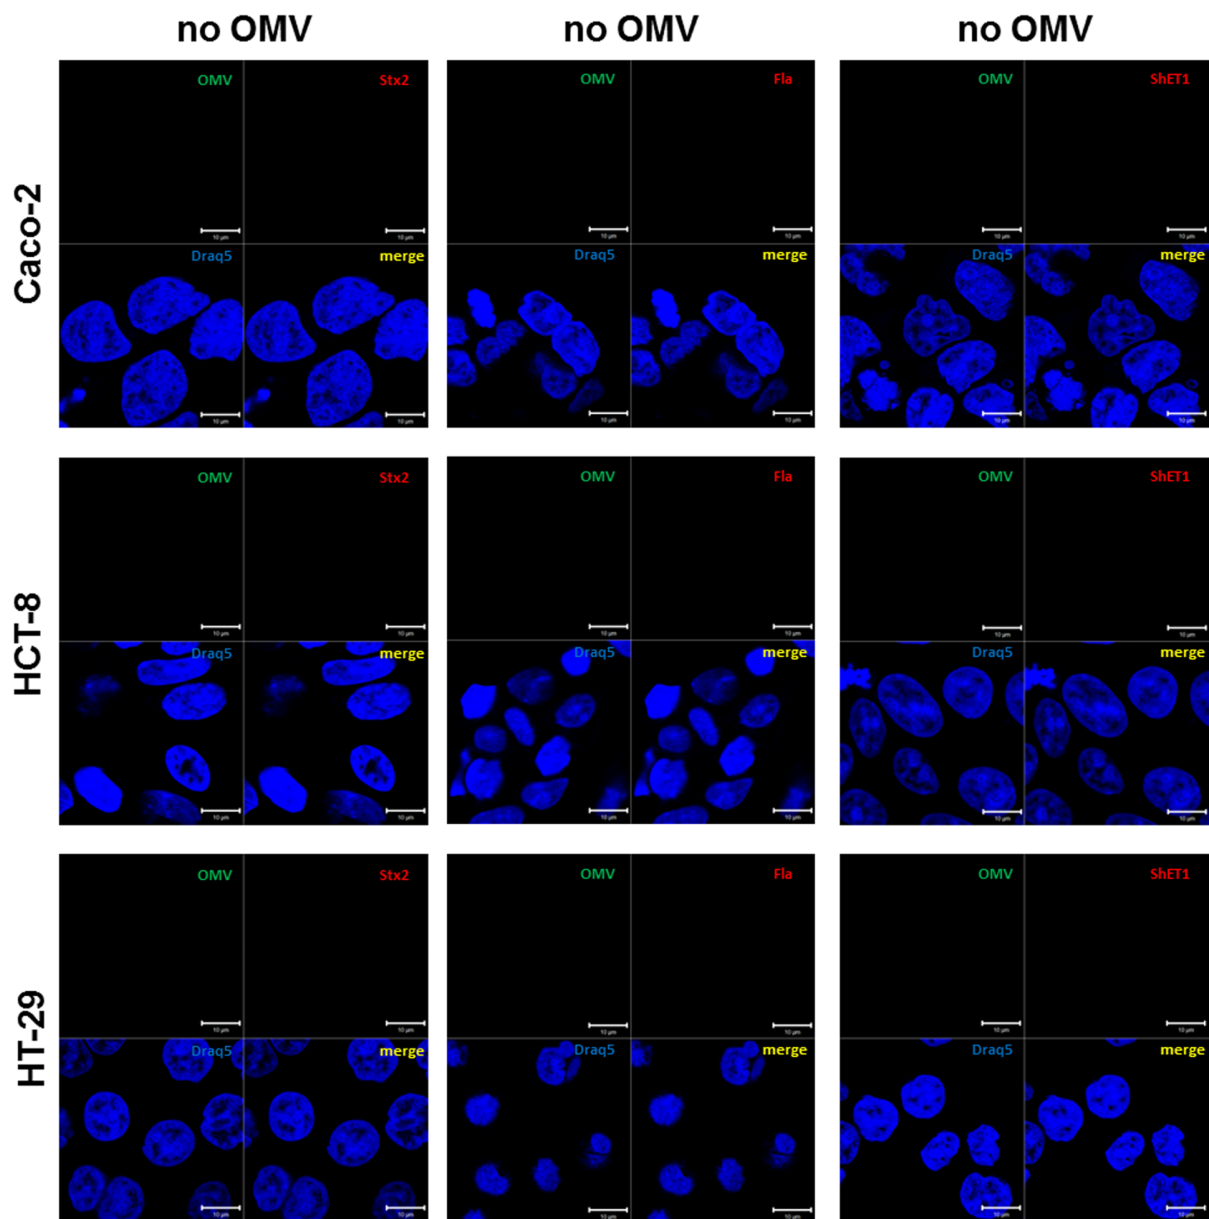

**Supplementary Figure S1. CLSM of control cells.** Cells were incubated for 6 h with OMV buffer (20 mM TRIS-HCl, pH 8.0) instead of OMVs and stained for OMVs, Stx2a, H4 flagellin (Fla), ShET1 and nuclei as indicated in the legend to Fig. 5 b-d. Pictures were taken using a laser-scanning microscope (LSM 510 META microscope, equipped with a Plan-Apochromat 63x/1.4 oil immersion objective). Single fluorescence channels and merged images are shown as indicated. Scale bars are 10 μm.

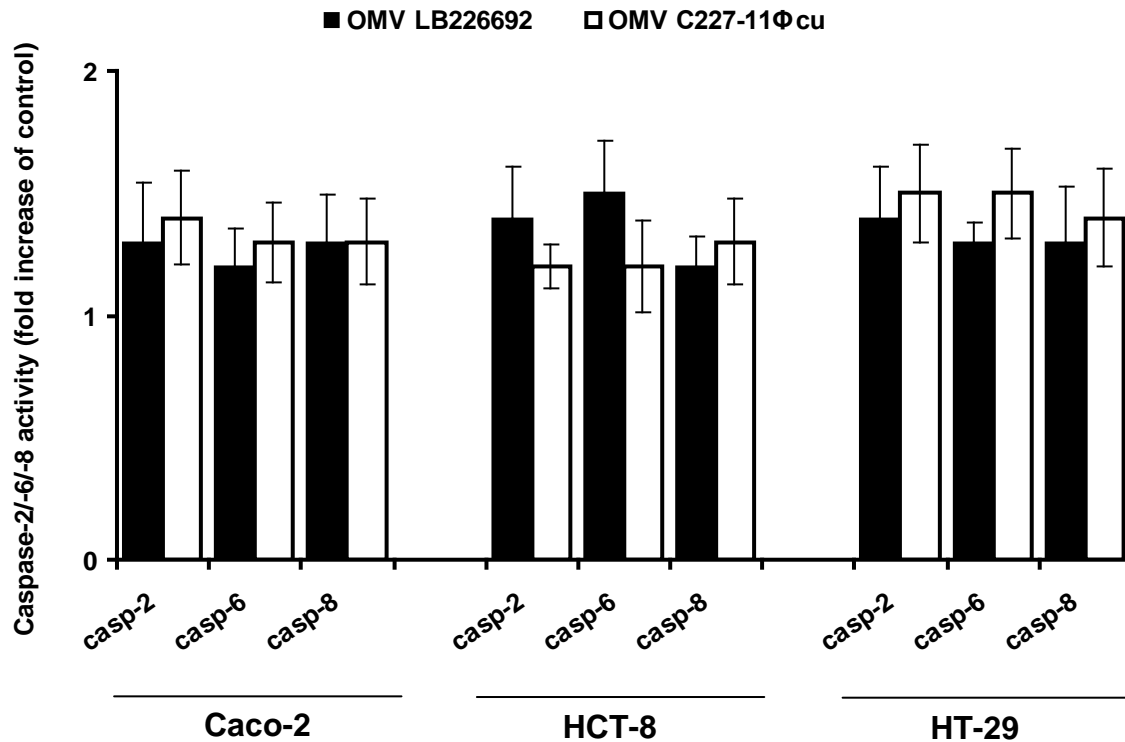

**Supplementary Figure S2. OMVs LB226692 do not activate caspase-2, caspase-6, and caspase-8 in human intestinal epithelial cells.** Cells were incubated (48 h) with OMVs LB226692 (containing 580 ng/ml of Stx2a) or OMVs C227-11Φcu (Stx2a-negative) or remained untreated. Caspase-2, caspase-6, and caspase-8 activities in cell lysates were determined using colorimetric substrates (VDVAD-pNA, VEID-pNA, and IETD-pNA, respectively) (Caspase Colorimetric Protease Assay Sampler Kit, Invitrogen). The colour intensity, which is proportional to the level of caspase enzymatic activity, was measured spectrophotometrically at 405 nm (FLUOstar OPTIMA reader). The caspase activity in OMV-treated cells was expressed as a fold-increase of that in untreated control cells (set up as 1). Data are means  $\pm$  standard deviations from three independent experiments.

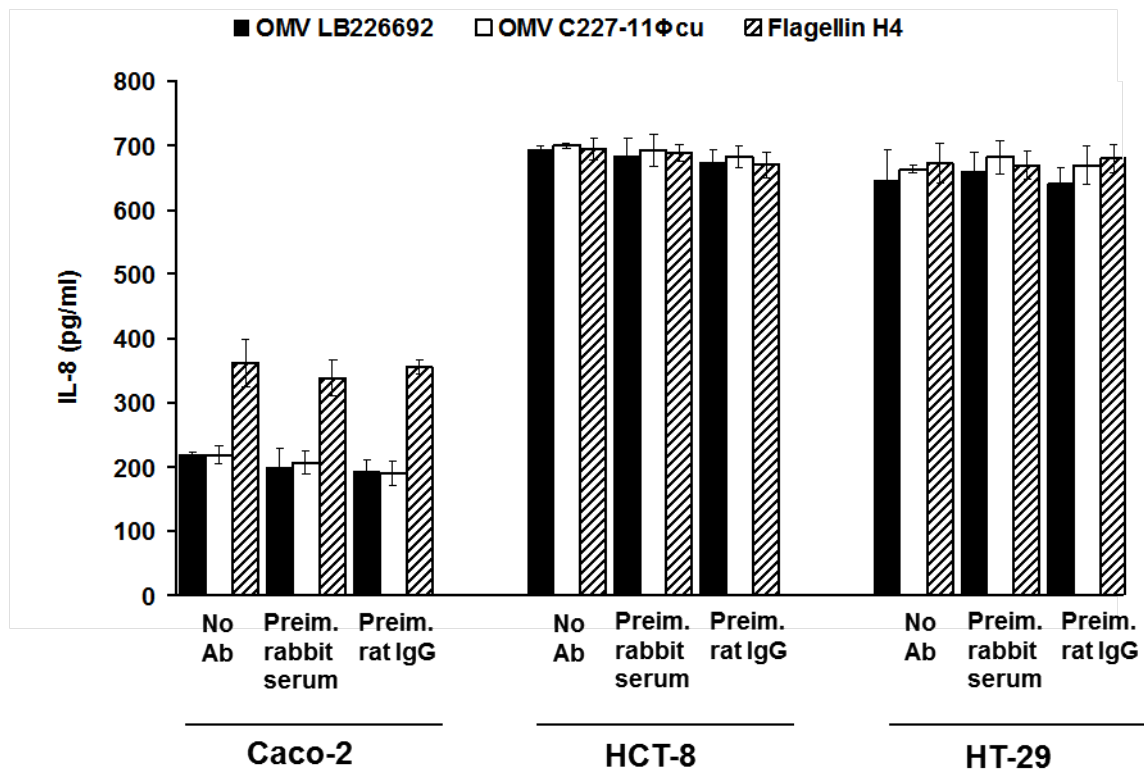

**Supplementary Figure S3. Preimmune sera do not inhibit IL-8 secretion elicited by *E. coli* O104:H4 OMVs and flagellin from human intestinal epithelial cells.** Cells were exposed for 24 h to: OMVs or isolated H4 flagellin in the absence of sera (columns No Ab); OMVs or flagellin which had been preincubated with preimmune rabbit serum (control to the anti-H4 antibody); OMVs or flagellin after the cell preincubation with preimmune rat IgG (control the anti-TLR5 neutralizing antibody). IL-8 secretion was quantified using a Single-Analyte IL-8 ELISArray. Data are means  $\pm$  standard deviations from three independent experiments.

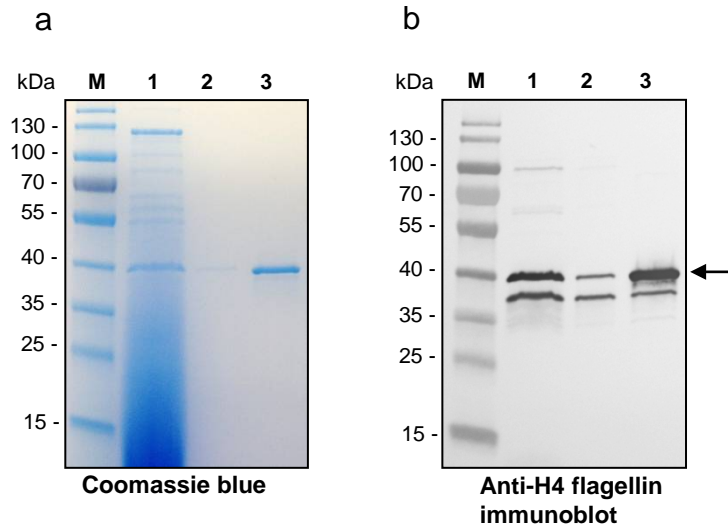

**Supplementary Figure S4. Isolation of H4 flagellin from *E. coli* O104:H4 strain C227-11Φcu.** H4 flagellin isolated from strain C227-11Φcu (~5 μg of protein/lane) (lanes 3) was (a) separated by SDS-PAGE and the gel was stained with Coomassie blue. (b) The proteins were transferred to a polyvinylidene fluoride membrane and immunoblotted with anti-H4 antibody. 50-fold concentrated OMV-free supernatant of strain C227-11Φcu (lanes 1) and 50-fold concentrated C227-11Φcu OMVs (lanes 2) were included for comparison. M, Marker IV (PepLab Biotechnologie); the sizes of the bands are shown on the left side. The arrow in panel b depicts the ~40 kDa flagellin band which is recognized by the anti-H4 antibody.

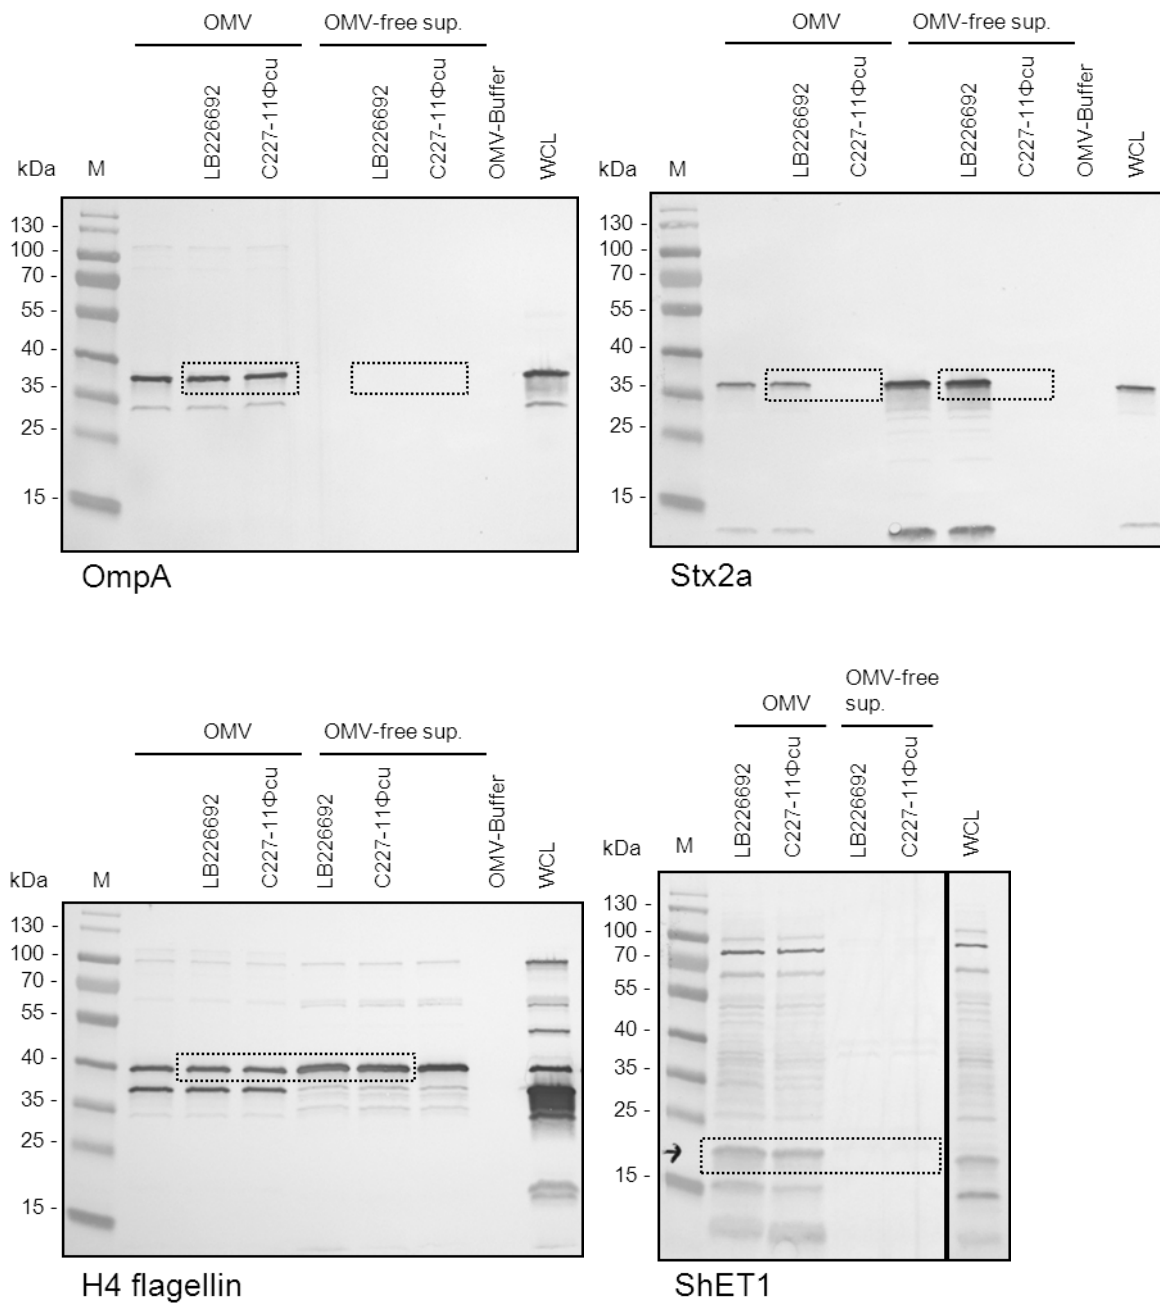

Supplementary Figure S5 (part 1) - continued on the next page

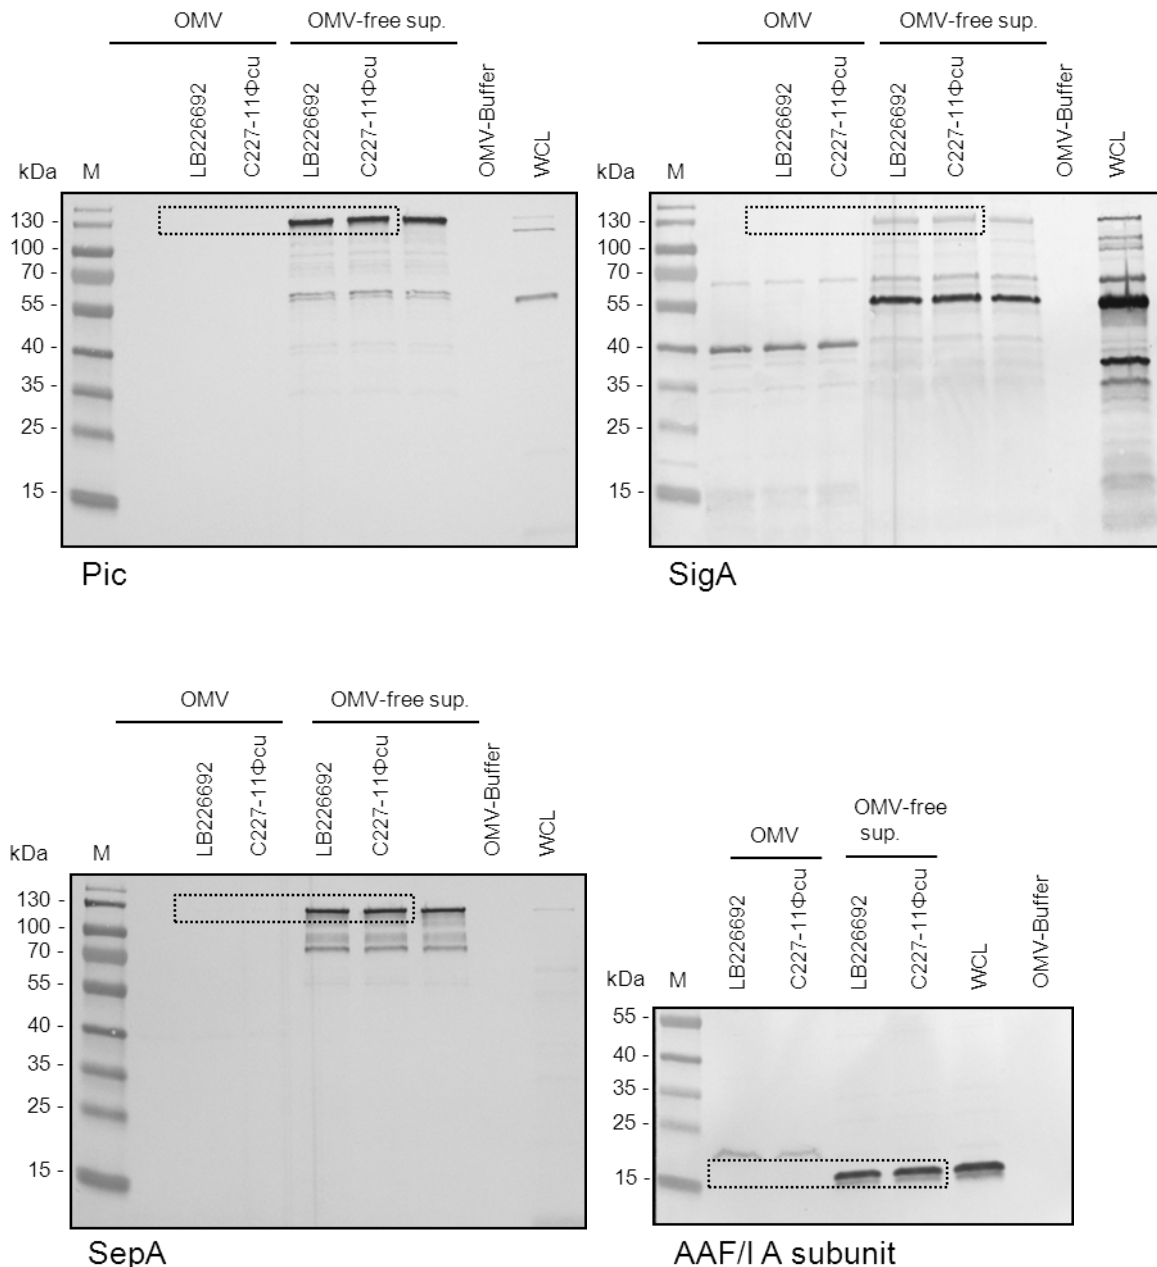

**Supplementary Figure S5. Distribution of virulence factors of *E. coli* O104:H4 outbreak strain in OMVs and OMV-free supernatants.** Full immunoblots from which the cropped versions shown in Fig. 2a were created. The crops shown in Fig. 2a are indicated by boxes. Whole cell lysate (WCL) and OMV-buffer were used as a positive and negative control, respectively. M, Marker IV (Peqlab Biotechnologie); the sizes of the bands are shown on the left side. (The bands without an indication depict an additional Stx2a-positive outbreak isolate which was initially investigated as a control but was not included in the final analysis).



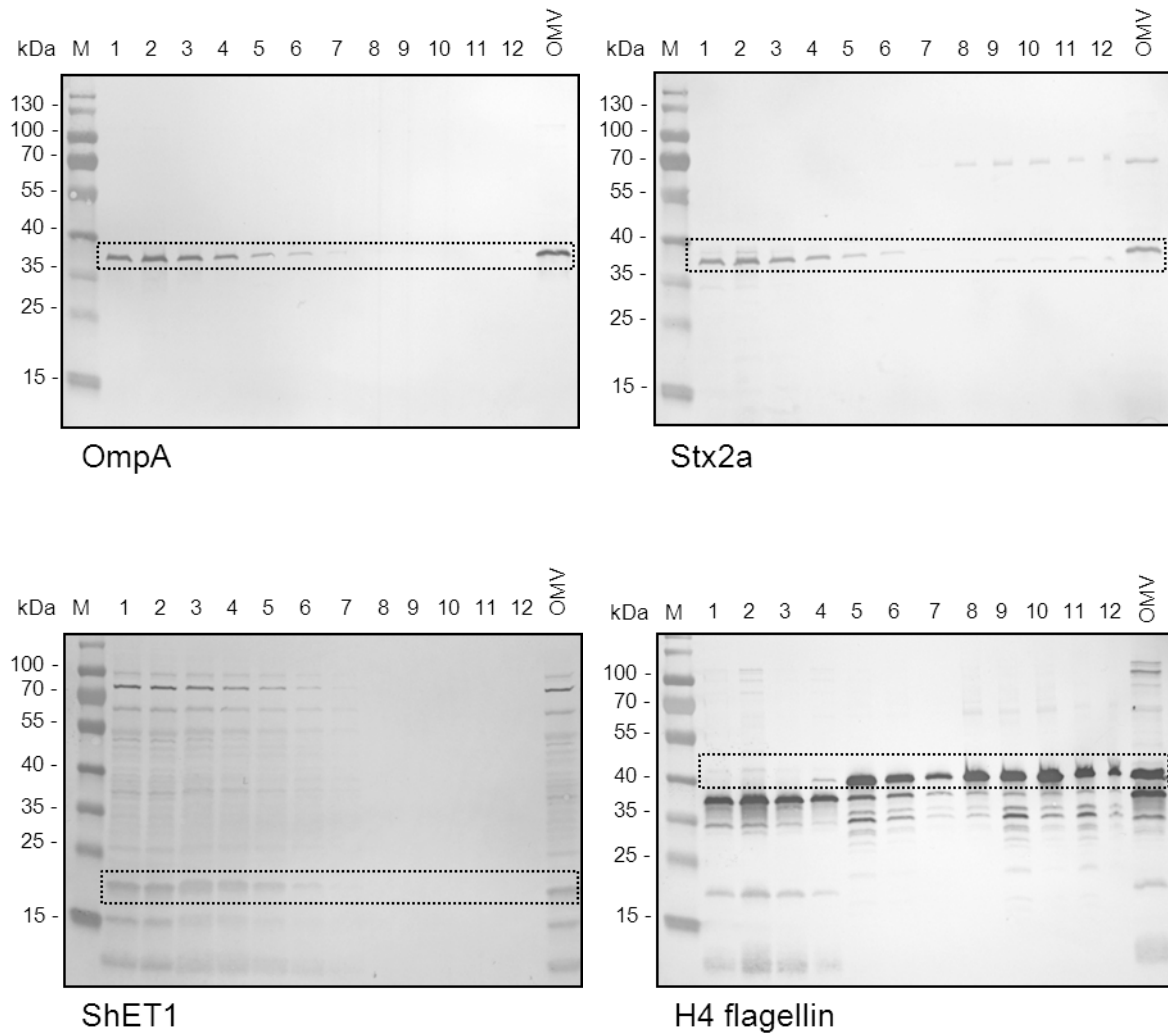

**Supplementary Figure S6. Distribution of Stx2a, ShET1 and H4 flagellin in OptiPrep density gradient fractions of OMVs LB226692.** Full immunoblots corresponding to the cropped versions shown in Fig. 2b are shown. The crops shown in Fig. 2b are indicated by boxes. The numbers above the blots indicate the order of the fractions in which they were collected from top to bottom after the gradient ultracentrifugation. The lanes designated OMV contain non-fractionated OMVs (positive control). M, Marker IV (PepLab Biotechnologie); the sizes of the bands are shown on the left side.

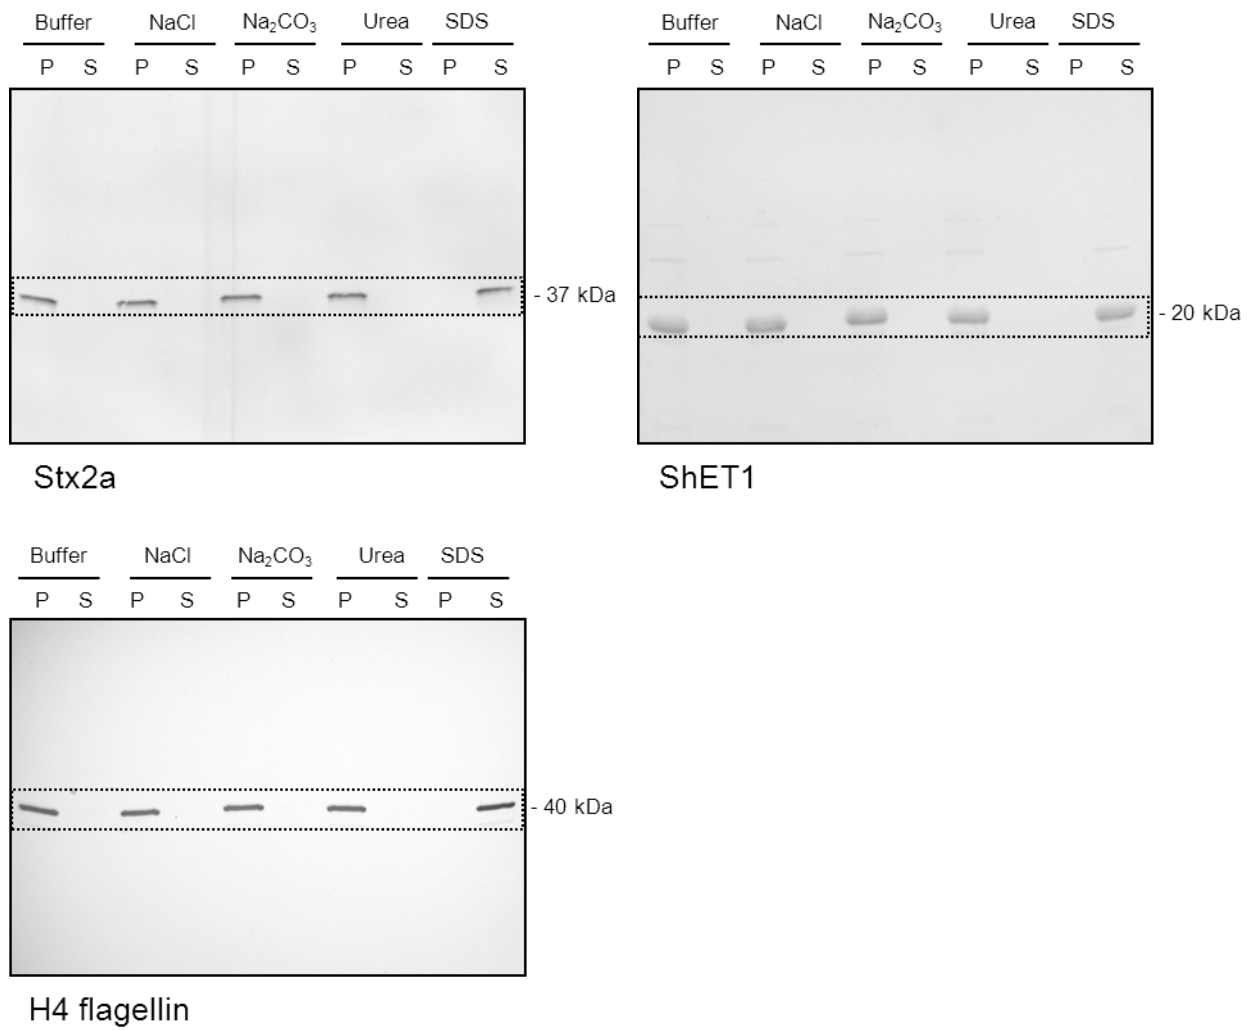

**Supplementary Figure S7. Dissociation assay of purified OMVs LB226692.** Full immunoblots corresponding to the cropped versions shown in Fig. 2c are shown. The crops shown in Fig. 2c are indicated by boxes. The sizes of the immunoreactive bands are shown on the right side.

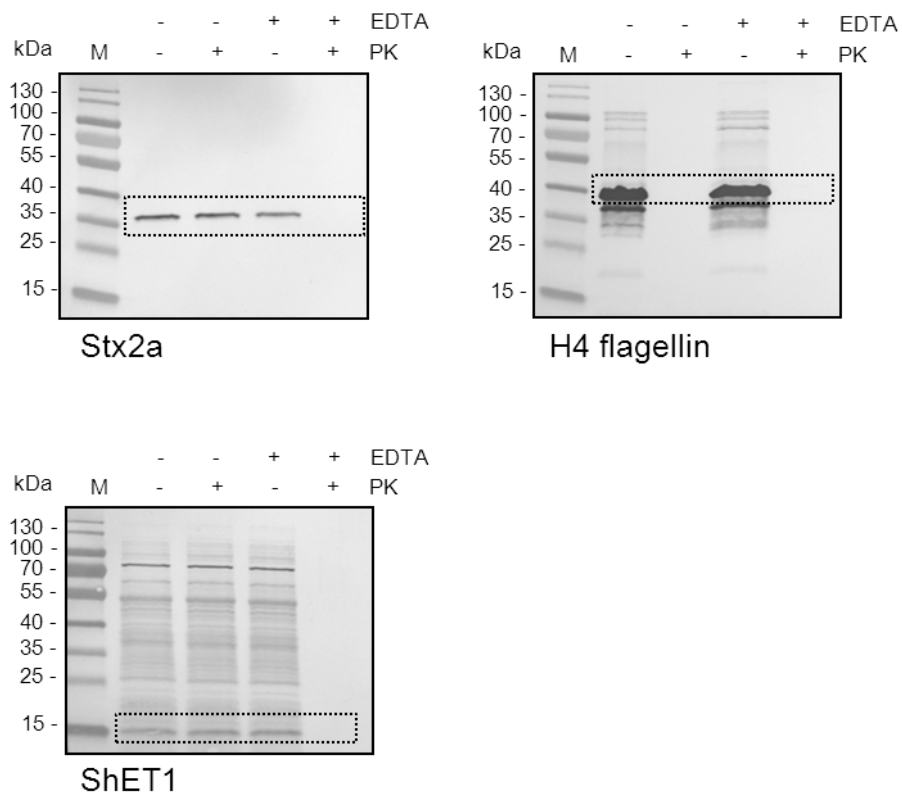

**Supplementary Figure S8. Proteinase K assay of LB226692 OMVs.** Full immunoblots corresponding to the cropped versions shown in Fig. 3c are shown. The crops shown in Fig. 3c are indicated by boxes. The corresponding treatments with proteinase K (PK) (untreated, PK-; treated; PK+) and EDTA (EDTA-, intact OMVs; EDTA+, lysed OMVs) are indicated above the immunoblots. M, Marker IV (Peqlab Biotechnologie); the sizes of the bands are shown on the left side.

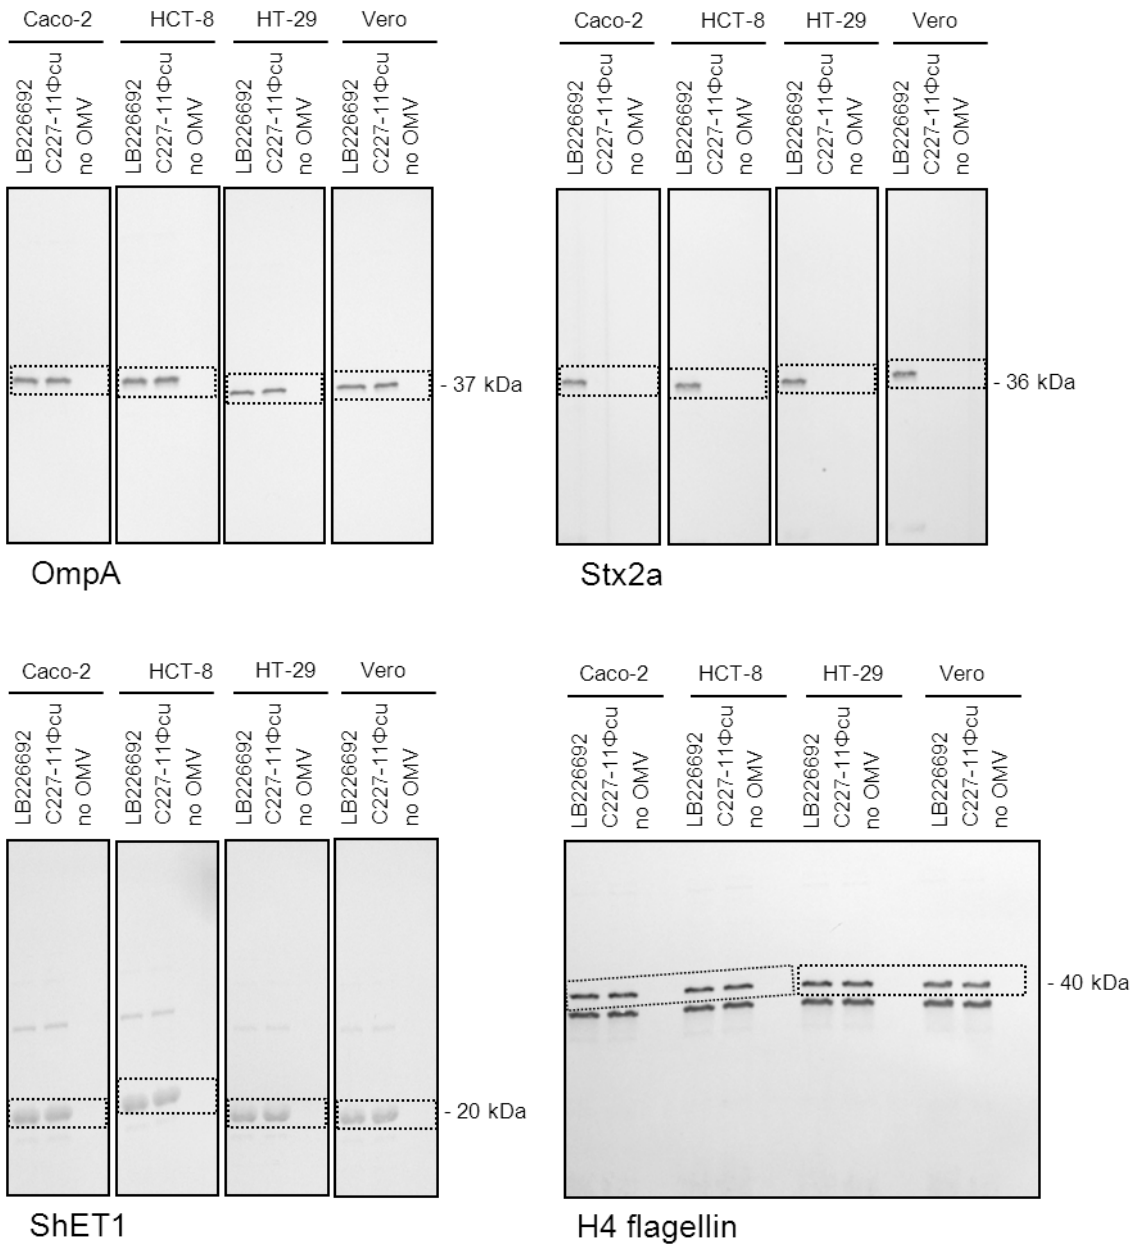

Supplementary Figure S9 (part 1) - continued on the next page

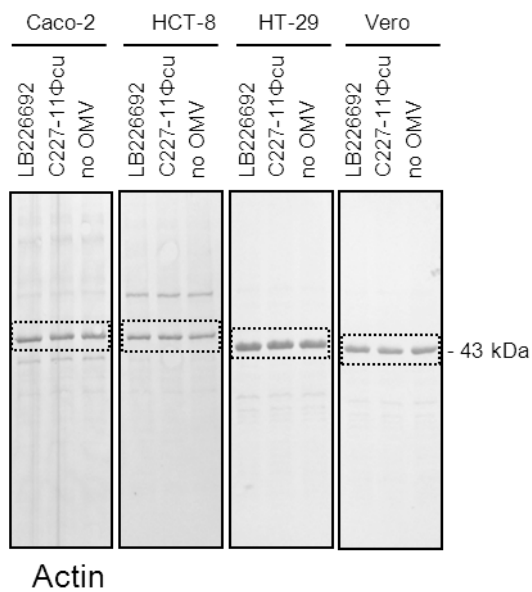

**Supplementary Figure S9. OMV-mediated intracellular delivery of Stx2a, ShET1, and H4 flagellin into human intestinal epithelial cells and Vero cells.** Full immunoblots corresponding to the cropped versions shown in Fig. 5a are shown. The crops shown in Fig. 5a are indicated by boxes. The sizes of the immunoreactive bands are shown on the right side.

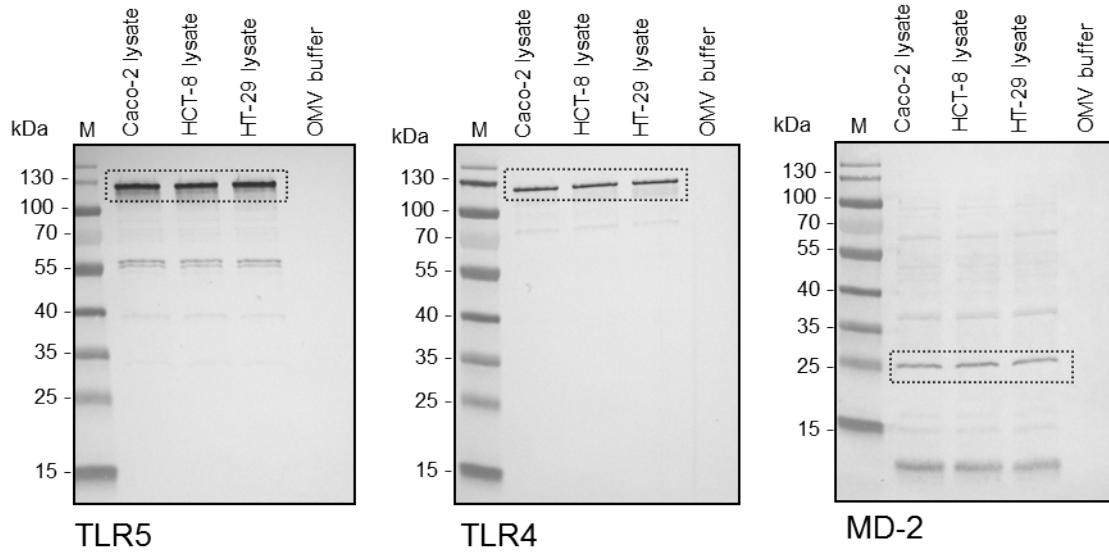

**Supplementary Figure S10. Detection of TLR5, TLR4 and MD-2 in lysates of Caco-2, HCT-8, and HT-29 cells using immunoblot.** Full immunoblots corresponding to the cropped versions shown in Fig. 8e are shown. The crops shown in Fig. 8e are indicated by boxes. OMV buffer served as a negative control. M, Marker IV (PeproLab Biotechnologie); the sizes of the bands are shown on the left side.

## Supplementary Tables

**Supplementary Table S1. DNA content in *E. coli* O104:H4 OMVs**

| OMVs from strain       | DNA amount (ng/ml) <sup>a</sup> in OMVs processed as indicated |               |                 |
|------------------------|----------------------------------------------------------------|---------------|-----------------|
|                        | Intact                                                         | Intact        | Lysed after     |
|                        | DNase-untreated                                                | DNase-treated | DNase treatment |
| LB226692               | 107.2 ± 15.5                                                   | 105.2 ± 16.3  | 100.8 ± 13.6    |
| C227-11Φ <sub>cu</sub> | 103.3 ± 19.7                                                   | 101.1 ± 19.6  | 99.4 ± 17.5     |

<sup>a</sup> The DNA amounts are expressed as means ± standard deviations from measurements of three different batches of each OMV preparation.

**Supplementary Table S2. Virulence genes of *E. coli* O104:H4 outbreak strain detected in OMVs**

| Virulence locus               | Product/marker for <sup>a</sup>   | LB226692 OMVs         |                        | C227-11Φcu OMVs       |                        |
|-------------------------------|-----------------------------------|-----------------------|------------------------|-----------------------|------------------------|
|                               |                                   | DNase No <sup>b</sup> | DNase Yes <sup>c</sup> | DNase No <sup>b</sup> | DNase Yes <sup>c</sup> |
| <i>stx<sub>2a</sub>A</i>      | Stx2a A subunit                   | +/+                   | +/+                    | -/-                   | -/-                    |
| <i>stx<sub>2a</sub>B</i>      | Stx2a B subunit                   | +/+                   | +/+                    | -/-                   | -/-                    |
| <i>iha</i>                    | Iha                               | +/-                   | -/-                    | +/-                   | -/-                    |
| <i>ter</i><br>ZABCDEF cluster | Tellurite resistance              | +/+                   | +/+                    | +/+                   | +/+                    |
| <i>pic</i>                    | Pic                               | +/-                   | -/-                    | +/-                   | -/-                    |
| <i>sigA</i>                   | SigA                              | +/-                   | -/-                    | +/-                   | -/-                    |
| <i>set1A</i>                  | ShET1 A subunit                   | +/-                   | -/-                    | +/-                   | -/-                    |
| <i>set1B</i>                  | ShET1 B subunit                   | +/-                   | -/-                    | +/-                   | -/-                    |
| <i>fliC<sub>H4</sub></i>      | H4 flagellin biosynthetic cluster | +/-                   | -/-                    | +/-                   | -/-                    |
| <i>aggR</i>                   | AggR                              | +/-                   | -/-                    | +/-                   | -/-                    |
| <i>aggA</i>                   | AAF/I fimbriae major subunit      | +/-                   | -/-                    | +/-                   | -/-                    |
| <i>sepA</i>                   | SepA                              | +/-                   | -/-                    | +/-                   | -/-                    |
| <i>aap</i>                    | Dispersin                         | +/-                   | -/-                    | +/-                   | -/-                    |
| <i>aatA</i>                   | Dispersin transporter             | +/-                   | -/-                    | +/-                   | -/-                    |

<sup>a</sup> Stx2a, Shiga toxin 2a (A and B subunit); Iha, iron-regulated gene A homologue adhesin; Pic, protein involved in intestinal colonisation; SigA, *Shigella* IgA protease-like homologue; ShET1, *Shigella* enterotoxin 1 (A and B subunit); AggR, AggR transcriptional regulator; SepA, *Shigella* extracellular protein A.

<sup>b</sup> Presence (+) or absence (-) of amplicon in non-purified OMVs / in density gradient-purified OMVs.

<sup>c</sup> Presence (+) or absence (-) of amplicon in DNase-treated intact OMVs / DNase-treated and subsequently lysed OMVs.



**Supplementary Table S3. Proteins identified in OMVs from *E. coli* O104:H4 outbreak strain**

| Accession no.         | Protein description                            | OMV LB226692   | OMV C227-11Φcu |
|-----------------------|------------------------------------------------|----------------|----------------|
| <b>Outer membrane</b> |                                                |                |                |
| gi 354857941          | Outer membrane protein A                       | + <sup>a</sup> | +              |
| gi 341916745          | Outer membrane protein C                       | +              | +              |
| gi 341920353          | Outer membrane protein F                       | +              | +              |
| gi 472423767          | Outer membrane protein W                       | +              | +              |
| gi 354857797          | Outer membrane protein X                       | +              | +              |
| gi 130682             | Outer membrane porin protein LC                | +              | +              |
| gi 354863302          | Outer membrane protein Slp                     | +              | +              |
| gi 354863719          | Outer membrane protein TolC                    | +              | +              |
| gi 354869769          | Outer membrane lipoprotein SlyB                | +              | +              |
| gi 354857669          | Peptidoglycan-associated lipoprotein           | +              | +              |
| gi 354869804          | Major outer membrane lipoprotein               | +              | +              |
| gi 341918794          | Murein lipoprotein lpp                         | +              | +              |
| gi 354867469          | Long-chain fatty acid transporter              | +              | +              |
| gi 341917536          | Hypothetical protein C22711_1180               | +              | +              |
| gi 341919927          | Hypothetical protein C22711_3567               | +              | +              |
| gi 341918829          | Hypothetical protein C22711_2472               | +              | +              |
| gi 341917258          | Hypothetical protein C22711_0902               | +              | +              |
| gi 341917385          | Hypothetical protein C22711_1030               | +              | +              |
| gi 341916624          | Hypothetical protein C22711_0268               | +              | +              |
| <b>Periplasm</b>      |                                                |                |                |
| gi 340736504          | Shiga toxin 2 A subunit                        | +              | -              |
| gi 340736503          | Shiga toxin 2 B subunit                        | +              | -              |
| gi 354867049          | Flagellar hook-basal body complex protein FliE | +              | +              |
| gi 354860155          | Hypothetical protein EUAG_00762                | -              | +              |
| gi 341916992          | Hypothetical protein C22711_0636               | +              | +              |
| <b>Inner membrane</b> |                                                |                |                |
| gi 354859437          | Entericidin B                                  | +              | +              |
| gi 354870404          | Glutamate:gamma-aminobutyrate antiporter       | +              | -              |
| gi 354857660          | Cytochrome d ubiquinol oxidase subunit1        | +              | +              |
| gi 354863369          | Xylose import ATP-binding protein XylG         | +              | +              |
| gi 341920553          | Hypothetical protein C22711_4192               | +              | +              |
| gi 341917249          | Hypothetical protein C22711_0893               | +              | +              |
| gi 110342306          | Hypothetical protein ECP_0514                  | +              | +              |
| <b>Cytoplasm</b>      |                                                |                |                |
| gi 150957079          | Bacterioferrin                                 | +              | +              |
| gi 26108577           | Ferritin 1                                     | +              | +              |
| gi 816212539          | 60 kDa chaperonin                              | +              | +              |
| gi 218355112          | Pyruvate dehydrogenase                         | +              | +              |
| gi 938166             | Glutamate decarboxylase                        | +              | +              |
| gi 354867389          | O-succinylbenzoate synthase                    | +              | +              |
| gi 354867171          | UDP-glucose 6-dehydrogenase                    | +              | +              |
| gi 354861355          | Glucose-6-phosphate isomerase                  | +              | +              |

|                             |                                            |   |   |
|-----------------------------|--------------------------------------------|---|---|
| gi 340737814                | Glutamine synthetase                       | + | + |
| gi 354857287                | Flagellar brake protein YcgR               | + | + |
| gi 354863851                | Translation initiation factor IF-2         | + | - |
| gi 1658028                  | Dehydrin                                   | - | + |
| gi 446318982                | Phage head protein, partial                | + | - |
| gi 384221                   | Starvation-inducible DNA-binding protein   | + | + |
| gi 745374501                | 50S ribosomal subunit protein L1           | + | + |
| gi 816212730                | 50S Ribosomal protein L10                  | + | + |
| gi 340738332                | 50S ribosomal protein L13                  | + | + |
| gi 340742056                | 30S ribosomal protein S2                   | + | + |
| gi 340738394                | 30S ribosomal protein S4                   | + | + |
| gi 354858002                | Hypothetical protein EUAG_01346            | + | - |
| gi 354858035                | Hypothetical protein EUAG_01379            | + | + |
| gi 341918492                | Hypothetical protein C22711_2135           | + | + |
| <b>Extracellular</b>        |                                            |   |   |
| gi 354867035                | Flagellin H4                               | + | + |
| gi 341920310                | Hypothetical protein C22711_3950           | + | + |
| <b>Unknown localisation</b> |                                            |   |   |
| gi 341918676                | DNA-binding transcriptional activator OsmE | + | + |
| gi 354868859                | Osmotically-inducible lipoprotein E        | + | + |
| gi 354869861                | P2 family phage major capsid protein       | + | - |
| gi 340739578                | fructose-bisphosphate aldolase             | + | + |
| gi 189357744                | Conserved hypothetical protein             | + | + |
| gi 4585432                  | Hypothetical protein phage                 | + | - |
| gi 209762284                | Hypothetical protein ECs3533               | + | + |
| gi 341918457                | Hypothetical protein C22711_2100           | + | + |
| gi 354856238                | Hypothetical protein EUAG_05098            | + | + |
| gi 354858036                | Hypothetical protein EUAG_01380            | + | + |
| gi 341918458                | Hypothetical protein C22711_2101           | + | + |
| gi 354868604                | Hypothetical protein EUAG_05105            | + | + |
| gi 354857849                | Hypothetical protein EUAG_01193            | + | + |
| gi 341917439                | Hypothetical protein C22711_1083           | + | + |
| gi 354869668                | Hypothetical protein EUAG_04529            | + | + |
| gi 341918933                | Hypothetical protein C22711_2576           | + | + |
| gi 354863782                | Hypothetical protein EUAG_01956            | + | + |
| gi 341919203                | Hypothetical protein C22711_2845           | + | + |
| gi 354869668                | Hypothetical protein EUAG_04529            | + | + |
| gi 341918444                | Hypothetical protein C22711_2087           | + | + |
| gi 341918945                | Hypothetical protein C22711_2588           | + | + |
| gi 354857030                | Hypothetical protein EUAG_01390            | + | + |

<sup>a</sup> +, presence of the protein; -, absence of the protein.

**Supplementary Table S4. Concentrations<sup>a</sup> of the total protein, Stx2a, H4 flagellin and O104 LPS in purified *E. coli* O104:H4 OMVs**

| OMVs from strain  | Total protein<br>concentration<br>( $\mu\text{g/ml}$ ) | Stx2a<br>concentration<br>( $\mu\text{g/ml}$ ) | Flagellin H4<br>concentration<br>( $\mu\text{g/ml}$ ) | LPS O104<br>concentration<br>( $\mu\text{g/ml}$ ) |
|-------------------|--------------------------------------------------------|------------------------------------------------|-------------------------------------------------------|---------------------------------------------------|
| LB226692          | 471 $\pm$ 53.6                                         | 58 $\pm$ 4.5                                   | 80 $\pm$ 5.1                                          | 950 $\pm$ 69.7                                    |
| C227-11 $\Phi$ cu | 466 $\pm$ 42.1                                         | 0                                              | 79 $\pm$ 4.4                                          | 946 $\pm$ 54.2                                    |

<sup>a</sup> Expressed as means  $\pm$  standard deviations from measurements of five different batches of each OMV preparation.

**Supplementary Table S5. Cytotoxicity titres of *E. coli* O104:H4 OMVs on human intestinal epithelial cells and Vero cells**

| Cell line | Cytotoxicity titres <sup>a</sup> |                                                               |                   |                                             |
|-----------|----------------------------------|---------------------------------------------------------------|-------------------|---------------------------------------------|
|           | OMV<br>LB226692                  | OMV<br>LB226692<br>(with anti-Stx2a<br>antibody) <sup>b</sup> | OMV<br>C227-11Φcu | EDL933<br>supernatant<br>(positive control) |
| Caco-2    | 8 (8-16) <sup>c</sup>            | 8 (4-32) <sup>c</sup>                                         | < 2               | 8 (8-16) <sup>c</sup>                       |
| HCT-8     | 32 (16-64) <sup>c</sup>          | 32 (16-64) <sup>c</sup>                                       | < 2               | 32 (16-128) <sup>c</sup>                    |
| HT-29     | 32 (16-128) <sup>c</sup>         | 32 (16-128) <sup>c</sup>                                      | < 2               | 32 (16-64) <sup>c</sup>                     |
| Vero      | 3072 (2048-4096)                 | 3072 (2048-8192)                                              | < 2               | 4096 (1024-8192)                            |

<sup>a</sup> Reciprocal values of the highest sample dilutions that killed 50% cells after 72 h; shown as a median (range) from five independent experiments; <2, no cytotoxicity observed with samples diluted 1:2.

<sup>b</sup> OMVs were preincubated with anti-Stx2a neutralizing antibody before adding to cells.

<sup>c</sup>  $P < 0.01$  (one-way ANOVA) for the cytotoxicity titre on each intestinal epithelial line compared to that on Vero cells.

**Supplementary Table S6. Genes present in all three *E. coli* O104:H4 strains whose genome sequences were compared (gene names are locus tags from the *E. coli* O157:H7 reference strain Sakai (GenBank accession no. NC\_002695))**

|         |         |         |         |         |         |         |         |
|---------|---------|---------|---------|---------|---------|---------|---------|
| ECs0002 | ECs0596 | ECs1416 | ECs2407 | ECs3111 | ECs3656 | ECs4180 | ECs4790 |
| ECs0003 | ECs0597 | ECs1417 | ECs2408 | ECs3112 | ECs3657 | ECs4181 | ECs4791 |
| ECs0004 | ECs0598 | ECs1419 | ECs2409 | ECs3113 | ECs3658 | ECs4182 | ECs4792 |
| ECs0005 | ECs0599 | ECs1420 | ECs2410 | ECs3114 | ECs3659 | ECs4183 | ECs4793 |
| ECs0006 | ECs0600 | ECs1421 | ECs2411 | ECs3115 | ECs3660 | ECs4184 | ECs4794 |
| ECs0007 | ECs0601 | ECs1423 | ECs2412 | ECs3117 | ECs3661 | ECs4185 | ECs4795 |
| ECs0008 | ECs0606 | ECs1424 | ECs2413 | ECs3118 | ECs3662 | ECs4186 | ECs4796 |
| ECs0009 | ECs0608 | ECs1425 | ECs2414 | ECs3119 | ECs3663 | ECs4187 | ECs4808 |
| ECs0010 | ECs0609 | ECs1426 | ECs2415 | ECs3120 | ECs3664 | ECs4188 | ECs4809 |
| ECs0012 | ECs0610 | ECs1427 | ECs2416 | ECs3124 | ECs3665 | ECs4189 | ECs4810 |
| ECs0013 | ECs0611 | ECs1428 | ECs2417 | ECs3125 | ECs3666 | ECs4191 | ECs4811 |
| ECs0014 | ECs0612 | ECs1429 | ECs2418 | ECs3126 | ECs3667 | ECs4192 | ECs4814 |
| ECs0015 | ECs0613 | ECs1431 | ECs2419 | ECs3127 | ECs3668 | ECs4193 | ECs4815 |
| ECs0017 | ECs0614 | ECs1432 | ECs2420 | ECs3128 | ECs3669 | ECs4194 | ECs4816 |
| ECs0018 | ECs0615 | ECs1433 | ECs2421 | ECs3137 | ECs3670 | ECs4195 | ECs4817 |
| ECs0019 | ECs0616 | ECs1434 | ECs2423 | ECs3138 | ECs3671 | ECs4196 | ECs4818 |
| ECs0026 | ECs0617 | ECs1435 | ECs2424 | ECs3139 | ECs3672 | ECs4197 | ECs4819 |
| ECs0027 | ECs0618 | ECs1436 | ECs2425 | ECs3140 | ECs3673 | ECs4198 | ECs4821 |
| ECs0028 | ECs0619 | ECs1437 | ECs2426 | ECs3141 | ECs3674 | ECs4199 | ECs4823 |
| ECs0029 | ECs0622 | ECs1438 | ECs2427 | ECs3142 | ECs3675 | ECs4200 | ECs4824 |
| ECs0030 | ECs0623 | ECs1440 | ECs2428 | ECs3143 | ECs3676 | ECs4201 | ECs4825 |
| ECs0031 | ECs0624 | ECs1441 | ECs2429 | ECs3144 | ECs3677 | ECs4202 | ECs4826 |
| ECs0032 | ECs0625 | ECs1442 | ECs2430 | ECs3145 | ECs3678 | ECs4203 | ECs4828 |
| ECs0033 | ECs0626 | ECs1443 | ECs2431 | ECs3146 | ECs3679 | ECs4204 | ECs4829 |
| ECs0034 | ECs0627 | ECs1444 | ECs2432 | ECs3147 | ECs3680 | ECs4205 | ECs4830 |
| ECs0035 | ECs0628 | ECs1445 | ECs2433 | ECs3148 | ECs3681 | ECs4206 | ECs4831 |
| ECs0036 | ECs0629 | ECs1446 | ECs2434 | ECs3149 | ECs3682 | ECs4207 | ECs4832 |
| ECs0037 | ECs0630 | ECs1447 | ECs2435 | ECs3150 | ECs3683 | ECs4208 | ECs4833 |
| ECs0038 | ECs0631 | ECs1448 | ECs2437 | ECs3151 | ECs3684 | ECs4209 | ECs4834 |
| ECs0039 | ECs0632 | ECs1449 | ECs2438 | ECs3152 | ECs3685 | ECs4210 | ECs4835 |
| ECs0040 | ECs0633 | ECs1450 | ECs2439 | ECs3153 | ECs3686 | ECs4211 | ECs4836 |
| ECs0041 | ECs0634 | ECs1451 | ECs2440 | ECs3154 | ECs3687 | ECs4212 | ECs4837 |
| ECs0042 | ECs0635 | ECs1452 | ECs2441 | ECs3155 | ECs3688 | ECs4213 | ECs4838 |
| ECs0043 | ECs0636 | ECs1453 | ECs2442 | ECs3156 | ECs3689 | ECs4214 | ECs4839 |
| ECs0044 | ECs0637 | ECs1454 | ECs2443 | ECs3159 | ECs3690 | ECs4215 | ECs4840 |
| ECs0045 | ECs0638 | ECs1455 | ECs2444 | ECs3160 | ECs3691 | ECs4216 | ECs4841 |
| ECs0046 | ECs0639 | ECs1456 | ECs2445 | ECs3161 | ECs3692 | ECs4217 | ECs4842 |
| ECs0047 | ECs0640 | ECs1457 | ECs2446 | ECs3162 | ECs3693 | ECs4218 | ECs4843 |
| ECs0048 | ECs0641 | ECs1458 | ECs2447 | ECs3163 | ECs3694 | ECs4219 | ECs4844 |
| ECs0049 | ECs0642 | ECs1459 | ECs2448 | ECs3164 | ECs3695 | ECs4220 | ECs4845 |
| ECs0050 | ECs0643 | ECs1460 | ECs2449 | ECs3165 | ECs3696 | ECs4221 | ECs4846 |
| ECs0051 | ECs0644 | ECs1461 | ECs2450 | ECs3166 | ECs3697 | ECs4222 | ECs4847 |
| ECs0054 | ECs0645 | ECs1462 | ECs2451 | ECs3167 | ECs3698 | ECs4223 | ECs4848 |
| ECs0055 | ECs0646 | ECs1463 | ECs2452 | ECs3168 | ECs3699 | ECs4224 | ECs4849 |
| ECs0056 | ECs0647 | ECs1464 | ECs2453 | ECs3169 | ECs3700 | ECs4225 | ECs4850 |
| ECs0057 | ECs0648 | ECs1465 | ECs2454 | ECs3170 | ECs3701 | ECs4226 | ECs4851 |
| ECs0058 | ECs0649 | ECs1466 | ECs2455 | ECs3171 | ECs3702 | ECs4227 | ECs4852 |

|         |         |         |         |         |         |         |         |
|---------|---------|---------|---------|---------|---------|---------|---------|
| ECs0059 | ECs0650 | ECs1467 | ECs2456 | ECs3172 | ECs3703 | ECs4228 | ECs4853 |
| ECs0060 | ECs0651 | ECs1468 | ECs2457 | ECs3173 | ECs3704 | ECs4229 | ECs4856 |
| ECs0062 | ECs0652 | ECs1469 | ECs2458 | ECs3174 | ECs3706 | ECs4230 | ECs4857 |
| ECs0063 | ECs0653 | ECs1470 | ECs2459 | ECs3175 | ECs3708 | ECs4231 | ECs4858 |
| ECs0064 | ECs0654 | ECs1471 | ECs2460 | ECs3176 | ECs3709 | ECs4232 | ECs4859 |
| ECs0065 | ECs0655 | ECs1472 | ECs2461 | ECs3177 | ECs3710 | ECs4233 | ECs4860 |
| ECs0066 | ECs0656 | ECs1473 | ECs2462 | ECs3178 | ECs3712 | ECs4234 | ECs4861 |
| ECs0067 | ECs0657 | ECs1474 | ECs2463 | ECs3180 | ECs3713 | ECs4235 | ECs4862 |
| ECs0068 | ECs0658 | ECs1475 | ECs2464 | ECs3181 | ECs3715 | ECs4236 | ECs4863 |
| ECs0069 | ECs0659 | ECs1476 | ECs2465 | ECs3182 | ECs3716 | ECs4238 | ECs4865 |
| ECs0070 | ECs0660 | ECs1477 | ECs2466 | ECs3183 | ECs3719 | ECs4239 | ECs4867 |
| ECs0071 | ECs0661 | ECs1478 | ECs2467 | ECs3184 | ECs3720 | ECs4240 | ECs4868 |
| ECs0072 | ECs0662 | ECs1479 | ECs2468 | ECs3185 | ECs3724 | ECs4241 | ECs4869 |
| ECs0074 | ECs0663 | ECs1480 | ECs2469 | ECs3186 | ECs3725 | ECs4242 | ECs4870 |
| ECs0075 | ECs0664 | ECs1481 | ECs2470 | ECs3187 | ECs3737 | ECs4243 | ECs4871 |
| ECs0076 | ECs0665 | ECs1482 | ECs2471 | ECs3188 | ECs3738 | ECs4244 | ECs4872 |
| ECs0077 | ECs0666 | ECs1483 | ECs2472 | ECs3189 | ECs3739 | ECs4245 | ECs4873 |
| ECs0078 | ECs0667 | ECs1484 | ECs2474 | ECs3190 | ECs3740 | ECs4246 | ECs4874 |
| ECs0079 | ECs0668 | ECs1485 | ECs2475 | ECs3191 | ECs3741 | ECs4247 | ECs4875 |
| ECs0080 | ECs0669 | ECs1486 | ECs2476 | ECs3192 | ECs3742 | ECs4248 | ECs4876 |
| ECs0081 | ECs0670 | ECs1487 | ECs2479 | ECs3193 | ECs3743 | ECs4250 | ECs4877 |
| ECs0082 | ECs0671 | ECs1488 | ECs2480 | ECs3194 | ECs3744 | ECs4251 | ECs4879 |
| ECs0084 | ECs0672 | ECs1489 | ECs2482 | ECs3195 | ECs3745 | ECs4252 | ECs4880 |
| ECs0085 | ECs0673 | ECs1490 | ECs2483 | ECs3196 | ECs3746 | ECs4253 | ECs4881 |
| ECs0086 | ECs0674 | ECs1491 | ECs2484 | ECs3197 | ECs3747 | ECs4254 | ECs4882 |
| ECs0087 | ECs0675 | ECs1492 | ECs2485 | ECs3198 | ECs3748 | ECs4255 | ECs4883 |
| ECs0088 | ECs0676 | ECs1493 | ECs2486 | ECs3199 | ECs3749 | ECs4256 | ECs4884 |
| ECs0089 | ECs0677 | ECs1494 | ECs2487 | ECs3200 | ECs3750 | ECs4257 | ECs4885 |
| ECs0090 | ECs0678 | ECs1495 | ECs2488 | ECs3202 | ECs3751 | ECs4258 | ECs4886 |
| ECs0091 | ECs0679 | ECs1496 | ECs2489 | ECs3203 | ECs3752 | ECs4259 | ECs4887 |
| ECs0092 | ECs0680 | ECs1497 | ECs2490 | ECs3204 | ECs3753 | ECs4260 | ECs4888 |
| ECs0093 | ECs0681 | ECs1498 | ECs2491 | ECs3205 | ECs3754 | ECs4264 | ECs4889 |
| ECs0094 | ECs0682 | ECs1499 | ECs2492 | ECs3206 | ECs3755 | ECs4265 | ECs4890 |
| ECs0095 | ECs0683 | ECs1500 | ECs2493 | ECs3207 | ECs3756 | ECs4266 | ECs4891 |
| ECs0096 | ECs0684 | ECs1524 | ECs2494 | ECs3208 | ECs3757 | ECs4267 | ECs4894 |
| ECs0097 | ECs0685 | ECs1557 | ECs2495 | ECs3209 | ECs3758 | ECs4268 | ECs4895 |
| ECs0098 | ECs0686 | ECs1571 | ECs2496 | ECs3210 | ECs3759 | ECs4269 | ECs4896 |
| ECs0099 | ECs0689 | ECs1572 | ECs2497 | ECs3211 | ECs3760 | ECs4273 | ECs4897 |
| ECs0100 | ECs0690 | ECs1573 | ECs2499 | ECs3212 | ECs3761 | ECs4274 | ECs4898 |
| ECs0101 | ECs0691 | ECs1601 | ECs2500 | ECs3213 | ECs3762 | ECs4275 | ECs4899 |
| ECs0102 | ECs0692 | ECs1602 | ECs2501 | ECs3214 | ECs3764 | ECs4276 | ECs4900 |
| ECs0103 | ECs0694 | ECs1603 | ECs2502 | ECs3215 | ECs3765 | ECs4277 | ECs4901 |
| ECs0105 | ECs0696 | ECs1604 | ECs2503 | ECs3223 | ECs3766 | ECs4278 | ECs4902 |
| ECs0106 | ECs0697 | ECs1605 | ECs2504 | ECs3224 | ECs3767 | ECs4279 | ECs4904 |
| ECs0107 | ECs0698 | ECs1606 | ECs2506 | ECs3225 | ECs3768 | ECs4285 | ECs4905 |
| ECs0108 | ECs0699 | ECs1607 | ECs2507 | ECs3226 | ECs3769 | ECs4286 | ECs4906 |
| ECs0110 | ECs0700 | ECs1608 | ECs2508 | ECs3227 | ECs3770 | ECs4288 | ECs4907 |
| ECs0111 | ECs0704 | ECs1614 | ECs2509 | ECs3229 | ECs3771 | ECs4289 | ECs4908 |
| ECs0112 | ECs0705 | ECs1616 | ECs2510 | ECs3230 | ECs3772 | ECs4290 | ECs4909 |
| ECs0113 | ECs0706 | ECs1617 | ECs2511 | ECs3231 | ECs3773 | ECs4293 | ECs4910 |

|         |         |         |         |         |         |         |         |
|---------|---------|---------|---------|---------|---------|---------|---------|
| ECs0114 | ECs0707 | ECs1618 | ECs2512 | ECs3235 | ECs3774 | ECs4294 | ECs4911 |
| ECs0115 | ECs0708 | ECs1629 | ECs2513 | ECs3241 | ECs3775 | ECs4295 | ECs4913 |
| ECs0116 | ECs0709 | ECs1637 | ECs2514 | ECs3242 | ECs3776 | ECs4296 | ECs4914 |
| ECs0117 | ECs0710 | ECs1638 | ECs2515 | ECs3243 | ECs3777 | ECs4297 | ECs4915 |
| ECs0118 | ECs0713 | ECs1639 | ECs2516 | ECs3244 | ECs3778 | ECs4298 | ECs4916 |
| ECs0119 | ECs0714 | ECs1640 | ECs2517 | ECs3245 | ECs3779 | ECs4299 | ECs4917 |
| ECs0120 | ECs0715 | ECs1642 | ECs2518 | ECs3246 | ECs3780 | ECs4301 | ECs4918 |
| ECs0122 | ECs0716 | ECs1656 | ECs2519 | ECs3247 | ECs3781 | ECs4302 | ECs4919 |
| ECs0123 | ECs0717 | ECs1668 | ECs2520 | ECs3248 | ECs3782 | ECs4303 | ECs4920 |
| ECs0124 | ECs0718 | ECs1669 | ECs2521 | ECs3249 | ECs3784 | ECs4304 | ECs4921 |
| ECs0125 | ECs0719 | ECs1670 | ECs2522 | ECs3250 | ECs3785 | ECs4305 | ECs4922 |
| ECs0126 | ECs0720 | ECs1671 | ECs2523 | ECs3252 | ECs3786 | ECs4306 | ECs4923 |
| ECs0127 | ECs0721 | ECs1672 | ECs2524 | ECs3253 | ECs3787 | ECs4309 | ECs4924 |
| ECs0128 | ECs0722 | ECs1674 | ECs2525 | ECs3254 | ECs3788 | ECs4310 | ECs4925 |
| ECs0129 | ECs0723 | ECs1675 | ECs2526 | ECs3255 | ECs3789 | ECs4311 | ECs4926 |
| ECs0130 | ECs0724 | ECs1676 | ECs2527 | ECs3256 | ECs3790 | ECs4312 | ECs4927 |
| ECs0131 | ECs0725 | ECs1678 | ECs2528 | ECs3257 | ECs3793 | ECs4313 | ECs4928 |
| ECs0132 | ECs0726 | ECs1679 | ECs2529 | ECs3258 | ECs3794 | ECs4314 | ECs4929 |
| ECs0133 | ECs0727 | ECs1680 | ECs2530 | ECs3259 | ECs3795 | ECs4315 | ECs4930 |
| ECs0134 | ECs0728 | ECs1681 | ECs2531 | ECs3260 | ECs3796 | ECs4316 | ECs4931 |
| ECs0135 | ECs0732 | ECs1682 | ECs2532 | ECs3261 | ECs3797 | ECs4317 | ECs4932 |
| ECs0136 | ECs0733 | ECs1683 | ECs2533 | ECs3262 | ECs3798 | ECs4318 | ECs4933 |
| ECs0137 | ECs0734 | ECs1684 | ECs2534 | ECs3263 | ECs3799 | ECs4319 | ECs4934 |
| ECs0138 | ECs0735 | ECs1686 | ECs2535 | ECs3265 | ECs3800 | ECs4320 | ECs4936 |
| ECs0147 | ECs0736 | ECs1687 | ECs2536 | ECs3266 | ECs3801 | ECs4321 | ECs4937 |
| ECs0148 | ECs0737 | ECs1688 | ECs2537 | ECs3267 | ECs3802 | ECs4322 | ECs4938 |
| ECs0149 | ECs0738 | ECs1691 | ECs2538 | ECs3268 | ECs3803 | ECs4323 | ECs4939 |
| ECs0150 | ECs0739 | ECs1692 | ECs2539 | ECs3269 | ECs3804 | ECs4342 | ECs5005 |
| ECs0151 | ECs0740 | ECs1703 | ECs2540 | ECs3270 | ECs3805 | ECs4343 | ECs5006 |
| ECs0152 | ECs0745 | ECs1704 | ECs2541 | ECs3271 | ECs3806 | ECs4344 | ECs5007 |
| ECs0153 | ECs0746 | ECs1705 | ECs2542 | ECs3272 | ECs3807 | ECs4345 | ECs5008 |
| ECs0154 | ECs0747 | ECs1707 | ECs2543 | ECs3273 | ECs3808 | ECs4346 | ECs5009 |
| ECs0155 | ECs0748 | ECs1708 | ECs2544 | ECs3274 | ECs3809 | ECs4347 | ECs5010 |
| ECs0156 | ECs0749 | ECs1709 | ECs2546 | ECs3278 | ECs3810 | ECs4348 | ECs5011 |
| ECs0157 | ECs0751 | ECs1710 | ECs2547 | ECs3280 | ECs3811 | ECs4356 | ECs5012 |
| ECs0158 | ECs0752 | ECs1711 | ECs2548 | ECs3281 | ECs3812 | ECs4357 | ECs5013 |
| ECs0159 | ECs0753 | ECs1712 | ECs2549 | ECs3282 | ECs3813 | ECs4358 | ECs5014 |
| ECs0160 | ECs0754 | ECs1713 | ECs2550 | ECs3283 | ECs3814 | ECs4359 | ECs5015 |
| ECs0161 | ECs0768 | ECs1714 | ECs2551 | ECs3284 | ECs3815 | ECs4360 | ECs5016 |
| ECs0162 | ECs0769 | ECs1715 | ECs2552 | ECs3285 | ECs3816 | ECs4363 | ECs5017 |
| ECs0163 | ECs0770 | ECs1716 | ECs2553 | ECs3286 | ECs3817 | ECs4365 | ECs5018 |
| ECs0164 | ECs0771 | ECs1717 | ECs2554 | ECs3287 | ECs3818 | ECs4366 | ECs5019 |
| ECs0165 | ECs0772 | ECs1718 | ECs2555 | ECs3288 | ECs3819 | ECs4367 | ECs5020 |
| ECs0166 | ECs0773 | ECs1719 | ECs2556 | ECs3289 | ECs3820 | ECs4368 | ECs5021 |
| ECs0167 | ECs0775 | ECs1720 | ECs2557 | ECs3290 | ECs3821 | ECs4369 | ECs5022 |
| ECs0168 | ECs0776 | ECs1721 | ECs2558 | ECs3292 | ECs3822 | ECs4370 | ECs5023 |
| ECs0169 | ECs0777 | ECs1722 | ECs2559 | ECs3293 | ECs3823 | ECs4371 | ECs5024 |
| ECs0170 | ECs0778 | ECs1723 | ECs2560 | ECs3294 | ECs3824 | ECs4372 | ECs5025 |
| ECs0171 | ECs0779 | ECs1724 | ECs2561 | ECs3295 | ECs3825 | ECs4373 | ECs5026 |
| ECs0172 | ECs0780 | ECs1725 | ECs2562 | ECs3296 | ECs3826 | ECs4374 | ECs5028 |

|         |         |         |         |         |         |         |         |
|---------|---------|---------|---------|---------|---------|---------|---------|
| ECs0173 | ECs0781 | ECs1726 | ECs2563 | ECs3297 | ECs3827 | ECs4375 | ECs5029 |
| ECs0174 | ECs0782 | ECs1727 | ECs2564 | ECs3298 | ECs3828 | ECs4377 | ECs5031 |
| ECs0175 | ECs0783 | ECs1728 | ECs2565 | ECs3299 | ECs3829 | ECs4378 | ECs5032 |
| ECs0176 | ECs0784 | ECs1729 | ECs2566 | ECs3300 | ECs3830 | ECs4388 | ECs5033 |
| ECs0177 | ECs0785 | ECs1730 | ECs2567 | ECs3301 | ECs3831 | ECs4389 | ECs5034 |
| ECs0178 | ECs0786 | ECs1731 | ECs2568 | ECs3302 | ECs3832 | ECs4390 | ECs5035 |
| ECs0179 | ECs0787 | ECs1732 | ECs2569 | ECs3303 | ECs3833 | ECs4391 | ECs5036 |
| ECs0180 | ECs0788 | ECs1734 | ECs2570 | ECs3304 | ECs3834 | ECs4392 | ECs5037 |
| ECs0181 | ECs0789 | ECs1735 | ECs2571 | ECs3305 | ECs3835 | ECs4393 | ECs5038 |
| ECs0182 | ECs0790 | ECs1736 | ECs2572 | ECs3306 | ECs3836 | ECs4394 | ECs5039 |
| ECs0183 | ECs0791 | ECs1737 | ECs2573 | ECs3307 | ECs3837 | ECs4395 | ECs5040 |
| ECs0184 | ECs0792 | ECs1738 | ECs2574 | ECs3308 | ECs3838 | ECs4396 | ECs5041 |
| ECs0185 | ECs0793 | ECs1739 | ECs2575 | ECs3309 | ECs3840 | ECs4398 | ECs5042 |
| ECs0186 | ECs0794 | ECs1740 | ECs2576 | ECs3310 | ECs3841 | ECs4399 | ECs5043 |
| ECs0187 | ECs0795 | ECs1741 | ECs2577 | ECs3311 | ECs3842 | ECs4400 | ECs5044 |
| ECs0188 | ECs0796 | ECs1742 | ECs2579 | ECs3312 | ECs3873 | ECs4401 | ECs5045 |
| ECs0189 | ECs0797 | ECs1743 | ECs2580 | ECs3313 | ECs3874 | ECs4402 | ECs5046 |
| ECs0191 | ECs0798 | ECs1744 | ECs2581 | ECs3314 | ECs3875 | ECs4403 | ECs5047 |
| ECs0192 | ECs0799 | ECs1745 | ECs2582 | ECs3315 | ECs3876 | ECs4404 | ECs5048 |
| ECs0193 | ECs0800 | ECs1746 | ECs2583 | ECs3316 | ECs3877 | ECs4405 | ECs5049 |
| ECs0194 | ECs0801 | ECs1747 | ECs2584 | ECs3317 | ECs3878 | ECs4406 | ECs5050 |
| ECs0196 | ECs0802 | ECs1748 | ECs2585 | ECs3318 | ECs3879 | ECs4407 | ECs5051 |
| ECs0197 | ECs0804 | ECs1749 | ECs2586 | ECs3319 | ECs3880 | ECs4408 | ECs5052 |
| ECs0198 | ECs0819 | ECs1750 | ECs2587 | ECs3320 | ECs3881 | ECs4409 | ECs5053 |
| ECs0199 | ECs0822 | ECs1751 | ECs2588 | ECs3322 | ECs3882 | ECs4410 | ECs5054 |
| ECs0200 | ECs0843 | ECs1753 | ECs2589 | ECs3323 | ECs3883 | ECs4411 | ECs5055 |
| ECs0201 | ECs0851 | ECs1754 | ECs2590 | ECs3324 | ECs3884 | ECs4413 | ECs5056 |
| ECs0202 | ECs0852 | ECs1755 | ECs2591 | ECs3325 | ECs3885 | ECs4414 | ECs5057 |
| ECs0203 | ECs0853 | ECs1756 | ECs2592 | ECs3326 | ECs3886 | ECs4415 | ECs5058 |
| ECs0204 | ECs0854 | ECs1757 | ECs2593 | ECs3327 | ECs3887 | ECs4417 | ECs5059 |
| ECs0205 | ECs0855 | ECs1758 | ECs2594 | ECs3328 | ECs3889 | ECs4418 | ECs5060 |
| ECs0206 | ECs0856 | ECs1829 | ECs2595 | ECs3329 | ECs3890 | ECs4419 | ECs5062 |
| ECs0207 | ECs0857 | ECs1830 | ECs2596 | ECs3330 | ECs3891 | ECs4420 | ECs5063 |
| ECs0208 | ECs0858 | ECs1831 | ECs2597 | ECs3331 | ECs3892 | ECs4421 | ECs5064 |
| ECs0209 | ECs0859 | ECs1832 | ECs2598 | ECs3332 | ECs3893 | ECs4422 | ECs5065 |
| ECs0210 | ECs0860 | ECs1833 | ECs2599 | ECs3333 | ECs3894 | ECs4423 | ECs5066 |
| ECs0211 | ECs0861 | ECs1834 | ECs2600 | ECs3334 | ECs3895 | ECs4424 | ECs5075 |
| ECs0218 | ECs0862 | ECs1835 | ECs2601 | ECs3335 | ECs3896 | ECs4425 | ECs5077 |
| ECs0222 | ECs0863 | ECs1836 | ECs2602 | ECs3336 | ECs3898 | ECs4432 | ECs5078 |
| ECs0224 | ECs0864 | ECs1838 | ECs2603 | ECs3337 | ECs3899 | ECs4433 | ECs5079 |
| ECs0225 | ECs0866 | ECs1839 | ECs2604 | ECs3338 | ECs3900 | ECs4434 | ECs5080 |
| ECs0226 | ECs0867 | ECs1841 | ECs2605 | ECs3339 | ECs3901 | ECs4435 | ECs5081 |
| ECs0227 | ECs0868 | ECs1842 | ECs2608 | ECs3340 | ECs3902 | ECs4436 | ECs5082 |
| ECs0228 | ECs0869 | ECs1843 | ECs2609 | ECs3341 | ECs3903 | ECs4437 | ECs5083 |
| ECs0229 | ECs0870 | ECs1844 | ECs2610 | ECs3342 | ECs3905 | ECs4438 | ECs5084 |
| ECs0230 | ECs0871 | ECs1845 | ECs2612 | ECs3343 | ECs3906 | ECs4439 | ECs5085 |
| ECs0231 | ECs0872 | ECs1846 | ECs2613 | ECs3344 | ECs3907 | ECs4440 | ECs5086 |
| ECs0232 | ECs0873 | ECs1847 | ECs2614 | ECs3345 | ECs3910 | ECs4441 | ECs5087 |
| ECs0233 | ECs0874 | ECs1850 | ECs2615 | ECs3347 | ECs3911 | ECs4442 | ECs5088 |
| ECs0234 | ECs0875 | ECs1852 | ECs2616 | ECs3349 | ECs3918 | ECs4443 | ECs5089 |



|         |         |         |         |         |         |         |         |
|---------|---------|---------|---------|---------|---------|---------|---------|
| ECs0235 | ECs0877 | ECs1853 | ECs2625 | ECs3350 | ECs3919 | ECs4444 | ECs5090 |
| ECs0244 | ECs0878 | ECs1854 | ECs2629 | ECs3351 | ECs3920 | ECs4445 | ECs5091 |
| ECs0246 | ECs0879 | ECs1855 | ECs2631 | ECs3352 | ECs3921 | ECs4446 | ECs5092 |
| ECs0247 | ECs0880 | ECs1856 | ECs2634 | ECs3353 | ECs3922 | ECs4447 | ECs5093 |
| ECs0248 | ECs0881 | ECs1857 | ECs2638 | ECs3355 | ECs3923 | ECs4448 | ECs5094 |
| ECs0249 | ECs0882 | ECs1858 | ECs2639 | ECs3356 | ECs3924 | ECs4449 | ECs5095 |
| ECs0250 | ECs0883 | ECs1859 | ECs2642 | ECs3357 | ECs3925 | ECs4450 | ECs5096 |
| ECs0251 | ECs0884 | ECs1860 | ECs2643 | ECs3358 | ECs3926 | ECs4451 | ECs5098 |
| ECs0253 | ECs0885 | ECs1861 | ECs2644 | ECs3359 | ECs3927 | ECs4452 | ECs5099 |
| ECs0254 | ECs0886 | ECs1867 | ECs2645 | ECs3360 | ECs3928 | ECs4453 | ECs5100 |
| ECs0256 | ECs0887 | ECs1868 | ECs2650 | ECs3361 | ECs3929 | ECs4455 | ECs5101 |
| ECs0257 | ECs0888 | ECs1869 | ECs2651 | ECs3362 | ECs3931 | ECs4456 | ECs5102 |
| ECs0258 | ECs0889 | ECs1870 | ECs2652 | ECs3363 | ECs3932 | ECs4460 | ECs5103 |
| ECs0261 | ECs0890 | ECs1871 | ECs2653 | ECs3364 | ECs3933 | ECs4461 | ECs5104 |
| ECs0263 | ECs0891 | ECs1872 | ECs2654 | ECs3365 | ECs3935 | ECs4462 | ECs5105 |
| ECs0264 | ECs0892 | ECs1873 | ECs2655 | ECs3366 | ECs3936 | ECs4463 | ECs5106 |
| ECs0265 | ECs0893 | ECs1874 | ECs2656 | ECs3367 | ECs3937 | ECs4464 | ECs5107 |
| ECs0266 | ECs0894 | ECs1875 | ECs2659 | ECs3368 | ECs3938 | ECs4466 | ECs5108 |
| ECs0267 | ECs0895 | ECs1876 | ECs2660 | ECs3369 | ECs3939 | ECs4468 | ECs5109 |
| ECs0268 | ECs0896 | ECs1877 | ECs2661 | ECs3370 | ECs3940 | ECs4469 | ECs5110 |
| ECs0269 | ECs0897 | ECs1878 | ECs2664 | ECs3371 | ECs3941 | ECs4471 | ECs5111 |
| ECs0270 | ECs0898 | ECs1879 | ECs2665 | ECs3372 | ECs3942 | ECs4472 | ECs5112 |
| ECs0275 | ECs0899 | ECs1880 | ECs2666 | ECs3373 | ECs3943 | ECs4473 | ECs5113 |
| ECs0313 | ECs0902 | ECs1881 | ECs2667 | ECs3374 | ECs3944 | ECs4474 | ECs5114 |
| ECs0315 | ECs0903 | ECs1882 | ECs2668 | ECs3375 | ECs3945 | ECs4475 | ECs5115 |
| ECs0316 | ECs0904 | ECs1883 | ECs2669 | ECs3376 | ECs3946 | ECs4476 | ECs5132 |
| ECs0317 | ECs0905 | ECs1884 | ECs2676 | ECs3377 | ECs3947 | ECs4477 | ECs5133 |
| ECs0318 | ECs0908 | ECs1885 | ECs2677 | ECs3378 | ECs3948 | ECs4478 | ECs5134 |
| ECs0319 | ECs0909 | ECs1890 | ECs2678 | ECs3379 | ECs3949 | ECs4479 | ECs5135 |
| ECs0320 | ECs0910 | ECs1891 | ECs2679 | ECs3380 | ECs3950 | ECs4481 | ECs5136 |
| ECs0321 | ECs0911 | ECs1892 | ECs2680 | ECs3386 | ECs3951 | ECs4482 | ECs5138 |
| ECs0322 | ECs0912 | ECs1893 | ECs2681 | ECs3387 | ECs3952 | ECs4483 | ECs5139 |
| ECs0323 | ECs0913 | ECs1894 | ECs2682 | ECs3388 | ECs3953 | ECs4484 | ECs5140 |
| ECs0324 | ECs0915 | ECs1896 | ECs2683 | ECs3389 | ECs3954 | ECs4485 | ECs5141 |
| ECs0327 | ECs0916 | ECs1897 | ECs2684 | ECs3390 | ECs3955 | ECs4486 | ECs5142 |
| ECs0336 | ECs0917 | ECs1898 | ECs2685 | ECs3391 | ECs3956 | ECs4487 | ECs5143 |
| ECs0337 | ECs0918 | ECs1899 | ECs2686 | ECs3392 | ECs3957 | ECs4488 | ECs5144 |
| ECs0340 | ECs0919 | ECs1900 | ECs2687 | ECs3393 | ECs3958 | ECs4489 | ECs5145 |
| ECs0341 | ECs0920 | ECs1901 | ECs2688 | ECs3394 | ECs3959 | ECs4490 | ECs5146 |
| ECs0342 | ECs0921 | ECs1902 | ECs2689 | ECs3395 | ECs3960 | ECs4491 | ECs5147 |
| ECs0343 | ECs0922 | ECs1903 | ECs2690 | ECs3396 | ECs3961 | ECs4492 | ECs5148 |
| ECs0344 | ECs0923 | ECs1904 | ECs2691 | ECs3397 | ECs3962 | ECs4494 | ECs5149 |
| ECs0345 | ECs0924 | ECs1905 | ECs2692 | ECs3398 | ECs3963 | ECs4495 | ECs5150 |
| ECs0346 | ECs0925 | ECs1909 | ECs2693 | ECs3399 | ECs3964 | ECs4496 | ECs5151 |
| ECs0347 | ECs0926 | ECs1910 | ECs2694 | ECs3400 | ECs3966 | ECs4497 | ECs5152 |
| ECs0348 | ECs0927 | ECs1911 | ECs2695 | ECs3401 | ECs3967 | ECs4498 | ECs5153 |
| ECs0358 | ECs0928 | ECs1912 | ECs2696 | ECs3402 | ECs3969 | ECs4499 | ECs5154 |
| ECs0359 | ECs0929 | ECs1913 | ECs2697 | ECs3403 | ECs3970 | ECs4500 | ECs5155 |
| ECs0360 | ECs0930 | ECs1914 | ECs2698 | ECs3404 | ECs3971 | ECs4501 | ECs5156 |
| ECs0362 | ECs0931 | ECs1915 | ECs2699 | ECs3405 | ECs3972 | ECs4505 | ECs5157 |

|         |         |         |         |         |         |         |         |
|---------|---------|---------|---------|---------|---------|---------|---------|
| ECs0363 | ECs0932 | ECs1916 | ECs2700 | ECs3406 | ECs3973 | ECs4506 | ECs5158 |
| ECs0366 | ECs0933 | ECs1917 | ECs2705 | ECs3407 | ECs3974 | ECs4507 | ECs5159 |
| ECs0367 | ECs0934 | ECs1921 | ECs2706 | ECs3408 | ECs3975 | ECs4508 | ECs5160 |
| ECs0368 | ECs0935 | ECs1922 | ECs2707 | ECs3409 | ECs3976 | ECs4509 | ECs5161 |
| ECs0369 | ECs0936 | ECs1923 | ECs2708 | ECs3410 | ECs3977 | ECs4510 | ECs5162 |
| ECs0370 | ECs0937 | ECs1924 | ECs2709 | ECs3411 | ECs3978 | ECs4511 | ECs5163 |
| ECs0372 | ECs0938 | ECs1925 | ECs2710 | ECs3412 | ECs3979 | ECs4512 | ECs5164 |
| ECs0373 | ECs0943 | ECs1941 | ECs2711 | ECs3413 | ECs3980 | ECs4513 | ECs5165 |
| ECs0374 | ECs0944 | ECs1942 | ECs2752 | ECs3414 | ECs3981 | ECs4514 | ECs5166 |
| ECs0375 | ECs0945 | ECs1950 | ECs2774 | ECs3415 | ECs3982 | ECs4515 | ECs5167 |
| ECs0376 | ECs0946 | ECs2064 | ECs2777 | ECs3416 | ECs3983 | ECs4516 | ECs5168 |
| ECs0377 | ECs0947 | ECs2065 | ECs2778 | ECs3417 | ECs3984 | ECs4517 | ECs5169 |
| ECs0378 | ECs0952 | ECs2067 | ECs2779 | ECs3418 | ECs3985 | ECs4518 | ECs5170 |
| ECs0379 | ECs0953 | ECs2068 | ECs2780 | ECs3419 | ECs3987 | ECs4519 | ECs5171 |
| ECs0380 | ECs0954 | ECs2069 | ECs2783 | ECs3420 | ECs3988 | ECs4520 | ECs5172 |
| ECs0382 | ECs0955 | ECs2070 | ECs2784 | ECs3421 | ECs3989 | ECs4521 | ECs5173 |
| ECs0383 | ECs0956 | ECs2071 | ECs2785 | ECs3422 | ECs3990 | ECs4522 | ECs5174 |
| ECs0384 | ECs0957 | ECs2072 | ECs2786 | ECs3423 | ECs3991 | ECs4523 | ECs5175 |
| ECs0385 | ECs0958 | ECs2077 | ECs2787 | ECs3424 | ECs3992 | ECs4524 | ECs5176 |
| ECs0386 | ECs0959 | ECs2079 | ECs2788 | ECs3425 | ECs3993 | ECs4525 | ECs5177 |
| ECs0387 | ECs0960 | ECs2080 | ECs2807 | ECs3426 | ECs3994 | ECs4526 | ECs5178 |
| ECs0388 | ECs0961 | ECs2081 | ECs2809 | ECs3427 | ECs3995 | ECs4527 | ECs5179 |
| ECs0389 | ECs0962 | ECs2082 | ECs2811 | ECs3428 | ECs3996 | ECs4529 | ECs5180 |
| ECs0390 | ECs0963 | ECs2084 | ECs2812 | ECs3429 | ECs3997 | ECs4530 | ECs5184 |
| ECs0392 | ECs0964 | ECs2085 | ECs2813 | ECs3430 | ECs3998 | ECs4531 | ECs5185 |
| ECs0393 | ECs0965 | ECs2086 | ECs2814 | ECs3431 | ECs3999 | ECs4532 | ECs5186 |
| ECs0394 | ECs0966 | ECs2087 | ECs2815 | ECs3432 | ECs4000 | ECs4533 | ECs5187 |
| ECs0395 | ECs0967 | ECs2088 | ECs2816 | ECs3433 | ECs4002 | ECs4536 | ECs5188 |
| ECs0396 | ECs0968 | ECs2089 | ECs2817 | ECs3434 | ECs4003 | ECs4537 | ECs5189 |
| ECs0397 | ECs0969 | ECs2090 | ECs2818 | ECs3435 | ECs4004 | ECs4593 | ECs5190 |
| ECs0398 | ECs0970 | ECs2091 | ECs2819 | ECs3436 | ECs4005 | ECs4594 | ECs5191 |
| ECs0401 | ECs0971 | ECs2092 | ECs2820 | ECs3437 | ECs4006 | ECs4595 | ECs5192 |
| ECs0402 | ECs0972 | ECs2095 | ECs2821 | ECs3438 | ECs4007 | ECs4596 | ECs5194 |
| ECs0403 | ECs0973 | ECs2096 | ECs2822 | ECs3439 | ECs4008 | ECs4599 | ECs5195 |
| ECs0404 | ECs0974 | ECs2097 | ECs2823 | ECs3440 | ECs4009 | ECs4600 | ECs5196 |
| ECs0405 | ECs0976 | ECs2099 | ECs2824 | ECs3441 | ECs4010 | ECs4602 | ECs5197 |
| ECs0406 | ECs0977 | ECs2100 | ECs2825 | ECs3442 | ECs4011 | ECs4603 | ECs5198 |
| ECs0407 | ECs0978 | ECs2101 | ECs2826 | ECs3443 | ECs4012 | ECs4604 | ECs5199 |
| ECs0408 | ECs0979 | ECs2102 | ECs2827 | ECs3444 | ECs4013 | ECs4605 | ECs5200 |
| ECs0409 | ECs0980 | ECs2103 | ECs2829 | ECs3445 | ECs4014 | ECs4606 | ECs5201 |
| ECs0410 | ECs0981 | ECs2104 | ECs2830 | ECs3447 | ECs4015 | ECs4611 | ECs5202 |
| ECs0411 | ECs0982 | ECs2105 | ECs2846 | ECs3448 | ECs4016 | ECs4612 | ECs5203 |
| ECs0412 | ECs0983 | ECs2106 | ECs2847 | ECs3449 | ECs4017 | ECs4613 | ECs5204 |
| ECs0419 | ECs0984 | ECs2107 | ECs2848 | ECs3452 | ECs4018 | ECs4614 | ECs5205 |
| ECs0420 | ECs0985 | ECs2108 | ECs2849 | ECs3453 | ECs4019 | ECs4615 | ECs5206 |
| ECs0421 | ECs0986 | ECs2109 | ECs2850 | ECs3454 | ECs4020 | ECs4616 | ECs5207 |
| ECs0422 | ECs0987 | ECs2110 | ECs2851 | ECs3455 | ECs4021 | ECs4617 | ECs5208 |
| ECs0423 | ECs0988 | ECs2112 | ECs2852 | ECs3456 | ECs4022 | ECs4618 | ECs5209 |
| ECs0425 | ECs0989 | ECs2113 | ECs2854 | ECs3457 | ECs4027 | ECs4619 | ECs5210 |
| ECs0426 | ECs0990 | ECs2115 | ECs2855 | ECs3458 | ECs4028 | ECs4620 | ECs5211 |

|         |         |         |         |         |         |         |         |
|---------|---------|---------|---------|---------|---------|---------|---------|
| ECs0427 | ECs0991 | ECs2116 | ECs2856 | ECs3459 | ECs4029 | ECs4621 | ECs5212 |
| ECs0428 | ECs0992 | ECs2118 | ECs2857 | ECs3460 | ECs4030 | ECs4624 | ECs5213 |
| ECs0429 | ECs0993 | ECs2119 | ECs2858 | ECs3462 | ECs4031 | ECs4625 | ECs5214 |
| ECs0430 | ECs0994 | ECs2120 | ECs2859 | ECs3463 | ECs4032 | ECs4626 | ECs5215 |
| ECs0431 | ECs0995 | ECs2121 | ECs2860 | ECs3464 | ECs4033 | ECs4627 | ECs5216 |
| ECs0432 | ECs0996 | ECs2122 | ECs2861 | ECs3465 | ECs4034 | ECs4628 | ECs5217 |
| ECs0433 | ECs0997 | ECs2123 | ECs2862 | ECs3466 | ECs4035 | ECs4629 | ECs5218 |
| ECs0434 | ECs0998 | ECs2124 | ECs2863 | ECs3467 | ECs4036 | ECs4630 | ECs5219 |
| ECs0435 | ECs0999 | ECs2125 | ECs2864 | ECs3468 | ECs4037 | ECs4631 | ECs5220 |
| ECs0436 | ECs1000 | ECs2126 | ECs2865 | ECs3469 | ECs4038 | ECs4632 | ECs5221 |
| ECs0437 | ECs1001 | ECs2127 | ECs2866 | ECs3470 | ECs4039 | ECs4633 | ECs5222 |
| ECs0438 | ECs1002 | ECs2128 | ECs2867 | ECs3471 | ECs4040 | ECs4634 | ECs5224 |
| ECs0439 | ECs1003 | ECs2129 | ECs2868 | ECs3472 | ECs4041 | ECs4635 | ECs5225 |
| ECs0440 | ECs1004 | ECs2130 | ECs2871 | ECs3473 | ECs4042 | ECs4636 | ECs5226 |
| ECs0441 | ECs1005 | ECs2131 | ECs2872 | ECs3474 | ECs4043 | ECs4637 | ECs5228 |
| ECs0443 | ECs1006 | ECs2132 | ECs2873 | ECs3475 | ECs4044 | ECs4638 | ECs5229 |
| ECs0444 | ECs1007 | ECs2133 | ECs2878 | ECs3476 | ECs4045 | ECs4639 | ECs5231 |
| ECs0445 | ECs1008 | ECs2135 | ECs2879 | ECs3477 | ECs4046 | ECs4640 | ECs5232 |
| ECs0446 | ECs1009 | ECs2136 | ECs2880 | ECs3478 | ECs4047 | ECs4641 | ECs5233 |
| ECs0447 | ECs1010 | ECs2137 | ECs2881 | ECs3479 | ECs4048 | ECs4644 | ECs5234 |
| ECs0448 | ECs1011 | ECs2138 | ECs2882 | ECs3480 | ECs4049 | ECs4645 | ECs5235 |
| ECs0449 | ECs1012 | ECs2139 | ECs2883 | ECs3481 | ECs4050 | ECs4646 | ECs5236 |
| ECs0450 | ECs1013 | ECs2141 | ECs2884 | ECs3482 | ECs4051 | ECs4647 | ECs5237 |
| ECs0451 | ECs1014 | ECs2144 | ECs2885 | ECs3518 | ECs4052 | ECs4648 | ECs5238 |
| ECs0452 | ECs1015 | ECs2145 | ECs2886 | ECs3520 | ECs4053 | ECs4649 | ECs5239 |
| ECs0453 | ECs1017 | ECs2146 | ECs2887 | ECs3521 | ECs4054 | ECs4650 | ECs5240 |
| ECs0455 | ECs1018 | ECs2148 | ECs2888 | ECs3522 | ECs4055 | ECs4651 | ECs5241 |
| ECs0456 | ECs1019 | ECs2149 | ECs2889 | ECs3523 | ECs4056 | ECs4660 | ECs5280 |
| ECs0457 | ECs1020 | ECs2150 | ECs2890 | ECs3524 | ECs4057 | ECs4661 | ECs5281 |
| ECs0458 | ECs1022 | ECs2151 | ECs2891 | ECs3525 | ECs4058 | ECs4662 | ECs5282 |
| ECs0459 | ECs1025 | ECs2152 | ECs2892 | ECs3526 | ECs4059 | ECs4663 | ECs5283 |
| ECs0460 | ECs1026 | ECs2273 | ECs2893 | ECs3527 | ECs4060 | ECs4664 | ECs5284 |
| ECs0463 | ECs1027 | ECs2276 | ECs2894 | ECs3528 | ECs4061 | ECs4671 | ECs5285 |
| ECs0464 | ECs1029 | ECs2277 | ECs2895 | ECs3529 | ECs4062 | ECs4672 | ECs5286 |
| ECs0465 | ECs1030 | ECs2288 | ECs2896 | ECs3530 | ECs4063 | ECs4673 | ECs5287 |
| ECs0466 | ECs1031 | ECs2289 | ECs2897 | ECs3531 | ECs4064 | ECs4674 | ECs5288 |
| ECs0467 | ECs1032 | ECs2290 | ECs2899 | ECs3532 | ECs4065 | ECs4675 | ECs5297 |
| ECs0468 | ECs1033 | ECs2291 | ECs2900 | ECs3533 | ECs4066 | ECs4676 | ECs5298 |
| ECs0469 | ECs1034 | ECs2292 | ECs2901 | ECs3536 | ECs4067 | ECs4677 | ECs5299 |
| ECs0470 | ECs1035 | ECs2293 | ECs2902 | ECs3537 | ECs4068 | ECs4678 | ECs5300 |
| ECs0471 | ECs1036 | ECs2294 | ECs2903 | ECs3538 | ECs4069 | ECs4679 | ECs5303 |
| ECs0473 | ECs1037 | ECs2296 | ECs2904 | ECs3539 | ECs4070 | ECs4680 | ECs5305 |
| ECs0474 | ECs1038 | ECs2297 | ECs2905 | ECs3540 | ECs4071 | ECs4681 | ECs5307 |
| ECs0475 | ECs1039 | ECs2298 | ECs2906 | ECs3541 | ECs4072 | ECs4682 | ECs5308 |
| ECs0476 | ECs1040 | ECs2299 | ECs2907 | ECs3542 | ECs4073 | ECs4683 | ECs5310 |
| ECs0477 | ECs1041 | ECs2300 | ECs2911 | ECs3543 | ECs4074 | ECs4684 | ECs5311 |
| ECs0478 | ECs1042 | ECs2301 | ECs2912 | ECs3544 | ECs4075 | ECs4685 | ECs5312 |
| ECs0479 | ECs1043 | ECs2302 | ECs2913 | ECs3545 | ECs4076 | ECs4686 | ECs5313 |
| ECs0480 | ECs1044 | ECs2303 | ECs2919 | ECs3546 | ECs4077 | ECs4687 | ECs5315 |
| ECs0481 | ECs1045 | ECs2305 | ECs2920 | ECs3547 | ECs4078 | ECs4688 | ECs5316 |

|         |         |         |         |         |         |         |         |
|---------|---------|---------|---------|---------|---------|---------|---------|
| ECs0482 | ECs1046 | ECs2306 | ECs2925 | ECs3549 | ECs4079 | ECs4689 | ECs5317 |
| ECs0483 | ECs1047 | ECs2307 | ECs2926 | ECs3550 | ECs4080 | ECs4690 | ECs5318 |
| ECs0484 | ECs1048 | ECs2308 | ECs2927 | ECs3551 | ECs4081 | ECs4691 | ECs5319 |
| ECs0485 | ECs1049 | ECs2309 | ECs2930 | ECs3552 | ECs4082 | ECs4692 | ECs5320 |
| ECs0486 | ECs1050 | ECs2310 | ECs2934 | ECs3553 | ECs4083 | ECs4693 | ECs5321 |
| ECs0487 | ECs1051 | ECs2311 | ECs2935 | ECs3554 | ECs4084 | ECs4694 | ECs5322 |
| ECs0488 | ECs1052 | ECs2312 | ECs2936 | ECs3555 | ECs4085 | ECs4695 | ECs5323 |
| ECs0489 | ECs1053 | ECs2313 | ECs2937 | ECs3556 | ECs4086 | ECs4696 | ECs5324 |
| ECs0490 | ECs1054 | ECs2314 | ECs3014 | ECs3557 | ECs4087 | ECs4697 | ECs5325 |
| ECs0491 | ECs1094 | ECs2315 | ECs3015 | ECs3558 | ECs4088 | ECs4698 | ECs5326 |
| ECs0492 | ECs1128 | ECs2316 | ECs3016 | ECs3560 | ECs4089 | ECs4699 | ECs5327 |
| ECs0493 | ECs1129 | ECs2317 | ECs3017 | ECs3561 | ECs4090 | ECs4700 | ECs5328 |
| ECs0494 | ECs1130 | ECs2318 | ECs3018 | ECs3562 | ECs4091 | ECs4701 | ECs5329 |
| ECs0495 | ECs1131 | ECs2319 | ECs3019 | ECs3563 | ECs4092 | ECs4702 | ECs5330 |
| ECs0496 | ECs1132 | ECs2320 | ECs3020 | ECs3564 | ECs4094 | ECs4703 | ECs5331 |
| ECs0497 | ECs1133 | ECs2323 | ECs3021 | ECs3565 | ECs4095 | ECs4704 | ECs5332 |
| ECs0498 | ECs1134 | ECs2326 | ECs3022 | ECs3567 | ECs4096 | ECs4705 | ECs5333 |
| ECs0499 | ECs1135 | ECs2327 | ECs3023 | ECs3568 | ECs4097 | ECs4706 | ECs5334 |
| ECs0500 | ECs1136 | ECs2328 | ECs3024 | ECs3569 | ECs4098 | ECs4707 | ECs5335 |
| ECs0501 | ECs1137 | ECs2329 | ECs3026 | ECs3570 | ECs4099 | ECs4708 | ECs5336 |
| ECs0502 | ECs1138 | ECs2330 | ECs3033 | ECs3571 | ECs4101 | ECs4709 | ECs5337 |
| ECs0503 | ECs1139 | ECs2331 | ECs3034 | ECs3572 | ECs4102 | ECs4710 | ECs5340 |
| ECs0504 | ECs1140 | ECs2332 | ECs3035 | ECs3573 | ECs4103 | ECs4711 | ECs5341 |
| ECs0505 | ECs1141 | ECs2333 | ECs3036 | ECs3574 | ECs4104 | ECs4712 | ECs5342 |
| ECs0506 | ECs1142 | ECs2334 | ECs3037 | ECs3575 | ECs4105 | ECs4713 | ECs5343 |
| ECs0507 | ECs1143 | ECs2335 | ECs3038 | ECs3576 | ECs4106 | ECs4714 | ECs5344 |
| ECs0508 | ECs1144 | ECs2336 | ECs3039 | ECs3577 | ECs4107 | ECs4715 | ECs5345 |
| ECs0509 | ECs1145 | ECs2337 | ECs3040 | ECs3578 | ECs4108 | ECs4716 | ECs5346 |
| ECs0510 | ECs1146 | ECs2339 | ECs3041 | ECs3579 | ECs4109 | ECs4717 | ECs5347 |
| ECs0511 | ECs1147 | ECs2340 | ECs3042 | ECs3580 | ECs4110 | ECs4718 | ECs5348 |
| ECs0512 | ECs1148 | ECs2341 | ECs3043 | ECs3581 | ECs4111 | ECs4719 | ECs5349 |
| ECs0513 | ECs1149 | ECs2342 | ECs3044 | ECs3582 | ECs4112 | ECs4720 | ECs5350 |
| ECs0514 | ECs1150 | ECs2343 | ECs3045 | ECs3583 | ECs4113 | ECs4721 | ECs5351 |
| ECs0515 | ECs1151 | ECs2344 | ECs3046 | ECs3584 | ECs4114 | ECs4722 | ECs5352 |
| ECs0516 | ECs1152 | ECs2345 | ECs3047 | ECs3585 | ECs4115 | ECs4723 | ECs5353 |
| ECs0517 | ECs1153 | ECs2346 | ECs3048 | ECs3586 | ECs4116 | ECs4724 | ECs5354 |
| ECs0518 | ECs1154 | ECs2347 | ECs3049 | ECs3587 | ECs4117 | ECs4725 | ECs5355 |
| ECs0520 | ECs1155 | ECs2348 | ECs3050 | ECs3588 | ECs4118 | ECs4726 | ECs5356 |
| ECs0521 | ECs1158 | ECs2349 | ECs3051 | ECs3589 | ECs4119 | ECs4727 | ECs5357 |
| ECs0522 | ECs1159 | ECs2350 | ECs3053 | ECs3590 | ECs4120 | ECs4728 | ECs5358 |
| ECs0523 | ECs1250 | ECs2351 | ECs3054 | ECs3591 | ECs4121 | ECs4729 | ECs5359 |
| ECs0524 | ECs1252 | ECs2352 | ECs3055 | ECs3592 | ECs4122 | ECs4730 | ECs5360 |
| ECs0525 | ECs1253 | ECs2353 | ECs3056 | ECs3593 | ECs4123 | ECs4732 | ECs5361 |
| ECs0526 | ECs1254 | ECs2354 | ECs3057 | ECs3594 | ECs4124 | ECs4734 | ECs5362 |
| ECs0527 | ECs1255 | ECs2355 | ECs3058 | ECs3595 | ECs4125 | ECs4735 | ECs5363 |
| ECs0528 | ECs1256 | ECs2356 | ECs3059 | ECs3596 | ECs4127 | ECs4736 | ECs5364 |
| ECs0529 | ECs1257 | ECs2357 | ECs3060 | ECs3597 | ECs4128 | ECs4738 | ECs5365 |
| ECs0530 | ECs1258 | ECs2358 | ECs3061 | ECs3598 | ECs4129 | ECs4739 | ECs5375 |
| ECs0531 | ECs1259 | ECs2359 | ECs3062 | ECs3599 | ECs4130 | ECs4740 | ECs5377 |
| ECs0532 | ECs1260 | ECs2360 | ECs3063 | ECs3600 | ECs4131 | ECs4741 | ECs5380 |

|         |         |         |         |         |         |         |         |
|---------|---------|---------|---------|---------|---------|---------|---------|
| ECs0533 | ECs1261 | ECs2361 | ECs3064 | ECs3601 | ECs4132 | ECs4742 | ECs5381 |
| ECs0534 | ECs1263 | ECs2362 | ECs3065 | ECs3602 | ECs4133 | ECs4743 | ECs5382 |
| ECs0535 | ECs1264 | ECs2363 | ECs3066 | ECs3603 | ECs4134 | ECs4745 | ECs5383 |
| ECs0536 | ECs1265 | ECs2364 | ECs3067 | ECs3604 | ECs4135 | ECs4747 | ECs5391 |
| ECs0537 | ECs1267 | ECs2365 | ECs3068 | ECs3605 | ECs4136 | ECs4748 | ECs5411 |
| ECs0538 | ECs1268 | ECs2366 | ECs3069 | ECs3606 | ECs4137 | ECs4749 | ECs5414 |
| ECs0539 | ECs1269 | ECs2367 | ECs3070 | ECs3607 | ECs4140 | ECs4750 | ECs5421 |
| ECs0545 | ECs1270 | ECs2368 | ECs3071 | ECs3608 | ECs4141 | ECs4751 | ECs5423 |
| ECs0552 | ECs1271 | ECs2369 | ECs3072 | ECs3609 | ECs4142 | ECs4752 | ECs5426 |
| ECs0553 | ECs1297 | ECs2370 | ECs3073 | ECs3610 | ECs4143 | ECs4753 | ECs5432 |
| ECs0554 | ECs1298 | ECs2371 | ECs3074 | ECs3611 | ECs4144 | ECs4754 | ECs5460 |
| ECs0555 | ECs1299 | ECs2372 | ECs3075 | ECs3612 | ECs4145 | ECs4755 | ECs5463 |
| ECs0556 | ECs1304 | ECs2373 | ECs3076 | ECs3613 | ECs4146 | ECs4756 | ECs5464 |
| ECs0557 | ECs1343 | ECs2374 | ECs3077 | ECs3614 | ECs4147 | ECs4757 | ECs5484 |
| ECs0558 | ECs1344 | ECs2375 | ECs3078 | ECs3615 | ECs4148 | ECs4758 | ECs5486 |
| ECs0559 | ECs1345 | ECs2376 | ECs3079 | ECs3616 | ECs4149 | ECs4759 | ECs5487 |
| ECs0564 | ECs1346 | ECs2377 | ECs3080 | ECs3617 | ECs4150 | ECs4760 | ECs5495 |
| ECs0565 | ECs1348 | ECs2378 | ECs3081 | ECs3618 | ECs4151 | ECs4761 | ECs5496 |
| ECs0566 | ECs1349 | ECs2379 | ECs3082 | ECs3619 | ECs4152 | ECs4762 | ECs5497 |
| ECs0567 | ECs1350 | ECs2380 | ECs3083 | ECs3620 | ECs4153 | ECs4763 | ECs5498 |
| ECs0568 | ECs1351 | ECs2381 | ECs3084 | ECs3621 | ECs4154 | ECs4764 | ECs5530 |
| ECs0569 | ECs1352 | ECs2382 | ECs3085 | ECs3622 | ECs4155 | ECs4765 | ECs5531 |
| ECs0570 | ECs1353 | ECs2383 | ECs3086 | ECs3623 | ECs4156 | ECs4766 | ECs5532 |
| ECs0571 | ECs1354 | ECs2384 | ECs3087 | ECs3626 | ECs4157 | ECs4767 | ECs5533 |
| ECs0572 | ECs1358 | ECs2385 | ECs3088 | ECs3629 | ECs4158 | ECs4768 | ECs5536 |
| ECs0575 | ECs1359 | ECs2386 | ECs3089 | ECs3630 | ECs4159 | ECs4769 | ECs5537 |
| ECs0576 | ECs1360 | ECs2387 | ECs3090 | ECs3631 | ECs4160 | ECs4770 | ECs5541 |
| ECs0577 | ECs1362 | ECs2388 | ECs3091 | ECs3632 | ECs4161 | ECs4771 | ECs5549 |
| ECs0578 | ECs1364 | ECs2389 | ECs3092 | ECs3633 | ECs4162 | ECs4772 | ECs5556 |
| ECs0579 | ECs1365 | ECs2390 | ECs3093 | ECs3639 | ECs4163 | ECs4773 | ECs5562 |
| ECs0580 | ECs1366 | ECs2391 | ECs3094 | ECs3640 | ECs4164 | ECs4774 | ECs5575 |
| ECs0581 | ECs1367 | ECs2392 | ECs3096 | ECs3641 | ECs4165 | ECs4775 | ECs5584 |
| ECs0582 | ECs1370 | ECs2393 | ECs3097 | ECs3642 | ECs4166 | ECs4776 | ECs5586 |
| ECs0583 | ECs1374 | ECs2394 | ECs3098 | ECs3643 | ECs4167 | ECs4777 | ECs5593 |
| ECs0584 | ECs1375 | ECs2395 | ECs3099 | ECs3644 | ECs4168 | ECs4778 | ECs5596 |
| ECs0585 | ECs1376 | ECs2396 | ECs3100 | ECs3645 | ECs4169 | ECs4779 |         |
| ECs0586 | ECs1384 | ECs2397 | ECs3101 | ECs3646 | ECs4170 | ECs4780 |         |
| ECs0587 | ECs1386 | ECs2398 | ECs3102 | ECs3647 | ECs4171 | ECs4781 |         |
| ECs0588 | ECs1388 | ECs2399 | ECs3103 | ECs3648 | ECs4172 | ECs4782 |         |
| ECs0589 | ECs1389 | ECs2400 | ECs3104 | ECs3649 | ECs4173 | ECs4783 |         |
| ECs0590 | ECs1409 | ECs2401 | ECs3105 | ECs3650 | ECs4174 | ECs4784 |         |
| ECs0591 | ECs1410 | ECs2402 | ECs3106 | ECs3651 | ECs4175 | ECs4785 |         |
| ECs0592 | ECs1411 | ECs2403 | ECs3107 | ECs3652 | ECs4176 | ECs4786 |         |
| ECs0593 | ECs1413 | ECs2404 | ECs3108 | ECs3653 | ECs4177 | ECs4787 |         |
| ECs0594 | ECs1414 | ECs2405 | ECs3109 | ECs3654 | ECs4178 | ECs4788 |         |
| ECs0595 | ECs1415 | ECs2406 | ECs3110 | ECs3655 | ECs4179 | ECs4789 |         |

**Supplementary Video 1. Time-lapse observation of HCT-8 cells exposed to LB226692 OMVs.** (**upper panels**) Videos of stacked white light images (taken at 30 min intervals) of HCT-8 cells incubated with cell culture medium (control; left) or OMVs LB226692 (containing 580 ng/ml of Stx2a) (right). (**lower panels**) Videos of stacked segmented (green outlines) quantitative DHM phase contrast images of the corresponding measurements in the upper panels. The scale bar is valid for all videos and corresponds to 20  $\mu\text{m}$  (lower left panel). The corresponding time of the shown frames is depicted in the upper left panel.
